1 **The need to harmonize insecticide resistance testing: methodology, intensity**  
2 **concentrations and molecular mechanisms evaluated in *Aedes aegypti***  
3 **populations in Central America and Hispaniola**

4  
5 Sarah Ledoux<sup>1¶¶</sup>, Carolina Torres Gutierrez<sup>1¶¶</sup>, Neil F. Lobo<sup>2</sup>, Elizabeth Melany  
6 Murillo<sup>1</sup>, Silvia Pérez <sup>1</sup>, Rocío Guerra<sup>1</sup>, Sayra Chanquin Avendano<sup>1</sup>, Ángel Gabriel  
7 Orellana Herrera<sup>1</sup>, Aarón Mendoza<sup>1</sup>, Denis Escobar<sup>3,4</sup>, Gavino Guzmán Contreras<sup>1</sup>,  
8 Magdiel Rivera<sup>1</sup>, Gilda Ventura<sup>5</sup>, Rodrigue Anagonou<sup>1</sup>, Eliane Pierre-Louis<sup>1</sup>, Carmen  
9 Yurrita<sup>1</sup>, Francisco J. López Hun<sup>1</sup>, Camilo Duque<sup>6</sup>, Eduardo Romero<sup>7</sup>, Diane D.  
10 Lovin<sup>2</sup>, Joanne M. Cunningham<sup>2</sup>, Dereje Dengela<sup>1,8</sup>, Allison Belemvire<sup>9</sup>, Kellie  
11 Stewart<sup>9</sup>, Nelson Grisales\*<sup>1</sup>

12 ¶¶These authors contributed equally to this work.

13

14 <sup>1</sup> ZIKA AIRS project, Abt Associates Inc., International Development Division, 6130  
15 Executive Boulevard, Rockville, Maryland, United States of America;

16 <sup>2</sup> Department of Biological Sciences, Eck Institute for Global Health, University of  
17 Notre Dame, Notre Dame, IN, United States;

18 <sup>3</sup> Secretaria de Salud de Honduras (SESAL), Tegucigalpa;

19 <sup>4</sup> Microbiology research Institute, National Autonomous University of Honduras;

20 <sup>5</sup> Ministerio de Salud Pública, Centro de Prevención y Control de Enfermedades  
21 Transmitidas por Vectores y Zoonosis (CECOVEZ), Santo Domingo, República  
22 Dominicana;

23 <sup>6</sup> Universidad de Antioquia, Medellín, Colombia;

24 <sup>7</sup> Unidad de Enfermedades Transmitidas por Vectores, Ministerio de Salud,  
25 República de El Salvador, San Salvador,

26 <sup>8</sup> Vector Link project, Abt Associates Inc., International Development Division, 6130  
27 Executive Boulevard, Rockville, Maryland, United States of America;

28 <sup>9</sup> United States Agency for International Development, Washington, D.C., United  
29 States.

30

31 **Corresponding author:** \*Nelson\_Grisalesalzate@AbtAssoc.com;

32 keleret@gmail.com

33 **Disclaimer:** The authors' views expressed in this publication do not necessarily  
34 represent the views or positions of the U.S. Agency for International Development or  
35 the United States Government.

36

## 37 Abstract

### 38 Background

39 The Zika AIRS Project, a USAID-funded initiative worked across the Latin America  
40 and Caribbean regions from 2016 to 2019, as an emergency to contain the spread  
41 of the Zika virus. All entomological records in the target countries showed wide  
42 distribution and high abundance of *Aedes aegypti* populations, however the  
43 susceptibility profiles of these insects to insecticides commonly employed by vector  
44 control campaigns were in most cases incomplete or inexistent. In close  
45 collaboration with the Ministries of Health of individual countries, Zika-AIRS teams

46 conducted insecticide susceptibility testing of an array of insecticides in *A. aegypti*  
47 populations of each country. Procedures applied met the standard international  
48 protocols instructed by the World Health Organization and Centers for Disease  
49 Control and Prevention.

## 50 **Methodology and main findings**

51 The insecticides tested were selected under categories such as pyrethroids,  
52 organophosphates and carbamate. Results showed *A. aegypti* populations  
53 displaying high and widely distributed resistance to all pyrethroids across countries,  
54 tolerance to organophosphates and full susceptibility to a carbamate. Key  
55 inconsistencies between testing methods are presented and discussed. Additionally,  
56 four *kdr* mutations were analyzed to detect molecular mechanisms of insecticide  
57 resistance. The screening for *kdr* mutations suggested the widespread nature of  
58 V1016I mutation, linked to pyrethroid resistance in *A. aegypti* populations distributed  
59 and sampled in the above mentioned regions.

## 60 **Conclusions and perspectives**

61 This multi-country study contributes with updated information to the public health  
62 decision-makers across Central America and the Caribbean. This study provided  
63 training and established technical networks for more effective and sustainable  
64 insecticide surveillance programs. Most but not all records of insecticide resistance  
65 in *A. aegypti* were consistent between methodologies, thus inconsistent issues are  
66 discussed here to call for further improvement in procedures and convey more

67 practical guidelines for surveillance teams in countries where *Aedes*-borne diseases  
68 are endemic.

## 69 **Author summary**

70 At the forefront of the fight against arboviruses transmission is the insecticide-based  
71 vector control. All countries in the Latin American and Caribbean region invest  
72 valuable resources from their limited budget to acquire and implement insecticide-  
73 based tools, with non-existent or weak insecticide resistance monitoring programs.  
74 Hence, the USAID-funded Zika AIRS Project (ZAP) collaborated with the Ministries  
75 of Health of multiple countries to update the profile of susceptibility to insecticides in  
76 *Aedes aegypti* populations. We found widespread resistance to pyrethroid and  
77 organophosphate insecticides, which account to almost 100% of the products  
78 available to control adult mosquitoes. As we used both of World Health Organization  
79 and Centers for Disease Control and Prevention standard methods, we found many  
80 similarities and some inconsistencies in the susceptibility profiles obtained for the  
81 very same vector populations. Additionally, we obtained insight on potential  
82 molecular mechanisms of resistance across the countries, finding the *kdr* mutation  
83 V1016I possibly involved in loss of susceptibility.

84 This study is the biggest cross-country update of insecticide resistance for *Aedes*  
85 *aegypti* in years, and it should be used as evidence for improving the selection of  
86 insecticides in these countries and a call for further support to maintain insecticide  
87 resistance monitoring programs.

88

## 89 Introduction

90 Arboviruses are the most widely transmitted vector-borne diseases in the world. It is  
91 estimated that dengue fever, chikungunya, yellow fever and Zika infect more than  
92 390 million humans per year (1, 2). At least 3.9 billion people in 128 countries are at  
93 risk of infection by dengue virus alone (3), and according to the World Health  
94 Organization (WHO) 3-4 million people were affected by Zika virus in the Americas  
95 during the 2016 outbreak (4). During the current year (2019), the Central American  
96 and Caribbean regions have faced periods of high dengue transmission, that have  
97 forced countries like Honduras and Jamaica declared public health warnings in their  
98 territories and displayed emergency responses to counter dengue outbreaks (PAHO  
99 records of dengue incidence include 369,609 cases from Central America and  
100 21,115 cases from the Caribbean region, as reported in October 1<sup>st</sup>, 2019) (5). *Aedes*  
101 *aegypti*, the primary vector for all major arboviruses, is a container-breeding  
102 mosquito well adapted to domestic habitats located in the vicinity or inside human  
103 houses. Given the behavioral plasticity, rapid life cycle and invasive nature of *Ae.*  
104 *aegypti*, its distribution is virtually worldwide, in tropical and sub-tropical regions and  
105 in wide-ranging anthropic settings that include urban and rural areas. The expansion  
106 of *Ae. aegypti* will continue as climate change progresses, increasing the risk of  
107 arboviruses transmission in the near future, even in temperate regions (6, 7).

108 Efforts in mosquito control include community education, environmental  
109 modifications (i.e. larval site management) and use of chemical insecticides (8),  
110 ideally within an integrated vector management (IVM) strategy (9). The application  
111 of chemical insecticides to eliminate *Ae. aegypti* at multiple developmental stages

112 by targeting larval sites and adult female habitats is recommended in an IVM plan.  
113 Larviciding, as part of environmental management, may be applied using  
114 compression spraying, powder, or dissolved solid formulations (9). Adulticides are  
115 applied using residual surface treatments or spatial applications, where the former  
116 is recommended only for emergency events and the latter has both adulticide and  
117 larviciding effects (9).

118 Of the four WHO approved insecticide classes available for outdoor mosquito control  
119 (pyrethroids, organophosphates, neonicotinoids and carbamates) via ultra-low  
120 volume (ULV) spraying, only pyrethroids and organophosphates are widely used  
121 (10). This widespread and continuous use of a small number of insecticides has  
122 resulted in the emergence of insecticide resistance in wild *Ae. aegypti* populations,  
123 across entire regions of the Americas and other continents. Such occurrences have  
124 been reported by entomological monitoring programs across the globe with  
125 increasing frequency (11). Although vector control through ULV insecticide  
126 application remains as the preferred tool in Latin America, more evidence  
127 documenting its effectiveness is still required.

128 Regular surveillance generates the baseline evidence required for examining both  
129 intervention potential as well as efficacy. Local evidence should guide countries in  
130 the rational use of insecticides, and at the same time improve timing of operations  
131 and decisions involving type of applications required. Examples of strategies for  
132 vector control insecticide applications are rotations, mixtures or mosaic spraying.  
133 Despite campaigns by the Global Vector Control Response and Worldwide  
134 Insecticide Resistance Network, many countries still lack capacity – both technical

135 and financial - to optimally mobilize vector control intervention strategies (12, 13). A  
136 key component of entomological surveillance programs that utilize IVM in public  
137 health systems, remains insecticide susceptibility testing on local mosquito vector  
138 populations (14).

139 To determine *Ae. aegypti* susceptibility to insecticides the World Health Organization  
140 and the Centers for Disease Control and Prevention (CDC, Atlanta, USA) have  
141 provided standard procedures for laboratory bioassays (15, 16). These two  
142 methodologies evaluate mosquito tolerance to insecticide-specific diagnostic doses  
143 over time. Although both procedures are widely accepted as laboratorial surveillance  
144 to determine the susceptibility status of mosquito populations to insecticides used in  
145 public health, there are limited comparisons of both procedures towards establishing  
146 concordance of results (17).

147 A second step in the insecticide surveillance procedures recommended by WHO  
148 (46) include that any mosquito population found to be resistant to a given  
149 insecticide(s) should be further exposed to higher concentrations in order to assess  
150 the strength of the phenotypic resistance originally documented with discriminating  
151 concentrations (i.e. the intensity of resistance). Procedures that evaluate the effect  
152 of synergists on the resistant phenotypes are also included. Furthermore, other  
153 techniques may elucidate the biochemical and molecular mechanisms of insecticide  
154 resistance.

155 The molecular mechanisms of insecticide resistance can be grouped into four main  
156 categories: 1) enhanced metabolic resistance, 2) mutations in target sites, 3)  
157 cuticular resistance and 4) behavioral resistance. From these, the most documented

158 mechanism is the knockdown resistance (*kdr*), which is a target site mechanism that  
159 confers resistance to pyrethroids and organochlorines (18-21). In the Americas, *kdr*  
160 mutations have been reported in *Ae. aegypti* populations from Ecuador, (22), United  
161 States (23, 24), Colombia (25, 26), México (27-29), Brazil (30-35), Lesser Antilles  
162 (36-40), French Guiana (37), Venezuela (29, 41), Cuba (29, 39), Panamá (42) and  
163 Puerto Rico (43). Similar to insecticide resistance monitoring, molecular resistance  
164 research of *Ae. aegypti* populations is particularly limited for Central American and  
165 Caribbean countries (10, 26).

166 Though pyrethroids and organophosphates have been utilized for extended periods  
167 of time, even decades, to control *Ae. aegypti* in regions of Latin America and the  
168 Caribbean (LAC), very few countries have conducted regular surveillance on local  
169 mosquito populations to assess insecticide susceptibility. Only Mexico and Colombia  
170 have a consistent insecticide resistance monitoring program, with only Mexico  
171 reporting a nationwide study on *Ae. aegypti* insecticide susceptibility status in recent  
172 years (44).

173 This is the first multi-country study on *Ae. aegypti* insecticide resistance to a wide  
174 selection of insecticides products being used for vector control operations in El  
175 Salvador, Guatemala, Honduras, Dominican Republic and Haiti in recent years, in  
176 addition to exploring the molecular mechanisms expressed in wild populations of  
177 each country.

178

179

180



## 181 **Materials and methods**

### 182 **Study sites**

183 The study sites or sentinel sites selected were originally part of the United States  
184 Agency for International Development (USAID) funded Zika AIRS Project (ZAP) (45),  
185 implemented from 2016 to 2019 in order to combat the 2016 regional Zika  
186 emergency and reinforce vector control and monitoring capacity. The study sites  
187 were chosen in collaboration with each country's Ministry of Health, and based on  
188 Zika incidence in epidemiological reports. All locations per country are listed in Table  
189 1 and displayed in Figure 1.

190

191 **Figure 1.** Countries and sentinel sites sampled for *Ae. aegypti* susceptibility tests to  
192 insecticides. The colored regions represent municipalities in Dominican Republic, El  
193 Salvador, Guatemala, and Honduras, and districts in Haiti.  
194 \* The Dominican Republic site Manogwayabo was shortened to Manog.

195

196 **Table 1. List of countries and study sites with geographical coordinates, year  
197 of testing and type of methodology conducted.**

198

199

200

201

202

203

| Country            | County                         | Municipality              | Latitude  | Longitude   | Year of testing | Methodology |
|--------------------|--------------------------------|---------------------------|-----------|-------------|-----------------|-------------|
| Dominican Republic | Azua                           | Azua                      | 18.454228 | -70.734348  | 2017, 2018      | WHO, CDC    |
|                    | Barahona                       | Barahona                  | 18.2152   | -71.099625  | 2017, 2018      | WHO, CDC    |
|                    | Dajabón                        | Dajabón                   | 19.550871 | -71.705639  | 2017, 2018      | WHO, CDC    |
|                    | La Altagracia                  | Higüey                    | 18.614739 | -68.714353  | 2017, 2018      | WHO, CDC    |
|                    | Santo Domingo                  | Manoguayabo               | 18.484854 | -70.05474   | 2017, 2018      | WHO, CDC    |
|                    | Españillat                     | Moca                      | 19.391085 | -70.522803  | 2017, 2018      | WHO, CDC    |
|                    | San Cristóbal                  | San Cristóbal             | 18.433435 | -70.161944  | 2017, 2018      | WHO, CDC    |
|                    | Sánchez Ramírez                | Sánchez Ramírez           | 19.008983 | -70.147988  | 2017, 2018      | WHO, CDC    |
|                    | Santiago de los Caballeros     | Santiago                  | 19.444907 | -70.71192   | 2017, 2018      | WHO, CDC    |
|                    | Santo Domingo Oriental         | Villa Duarte              | 18.482112 | -69.877682  | 2017, 2018      | WHO, CDC    |
| El Salvador        | Chalatenango                   | Chalatenango              | 14.038192 | -88.935184  | 2017, 2018      | WHO, CDC    |
|                    | San Salvador                   | Mejicanos                 | 13.735495 | -89.217442  | 2017, 2018      | WHO, CDC    |
|                    | San Sebastián                  | San Sebastián             | 13.721708 | -88.820944  | 2017, 2018      | WHO, CDC    |
|                    | Santa Rita                     | Santa Rita                | 14.127649 | -89.00475   | 2017, 2018      | WHO, CDC    |
|                    | Verapaz                        | Verapaz                   | 13.643756 | -88.87109   | 2017, 2018      | WHO, CDC    |
| Guatemala          | Chiquimula                     | Chiquimula                | 14.797084 | -89.546268  | 2018, 2019      | WHO, CDC    |
|                    | El Progreso                    | San Agustín Acasaguastlan | 14.944536 | -89.96953   | 2018, 2019      | WHO, CDC    |
|                    | Zacapa                         | Zacapa                    | 14.97105  | -89.531932  | 2018, 2019      | WHO, CDC    |
| Haiti              | Ouest                          | Dessources                | 18.621703 | -72.2132347 | 2018, 2019      | WHO, CDC    |
|                    | Limbé                          | Limbé                     | 19.707323 | -72.404022  | 2018, 2019      | WHO, CDC    |
|                    | Milot                          | Milot                     | 19.608258 | -72.214626  | 2018, 2019      | WHO, CDC    |
|                    | Petite-Rivière-de-l'Artibonite | Petite Riviere            | 19.614234 | -72.146946  | 2018, 2019      | WHO, CDC    |
| Honduras           | Choluteca                      | Choluteca                 | 13.316062 | -87.163376  | 2017, 2018      | WHO, CDC    |
|                    | Comayagua                      | Comayagua                 | 14.455439 | -87.642716  | 2017, 2018      | WHO, CDC    |
|                    | El Paraíso                     | Danlí                     | 14.032734 | -86.57246   | 2017, 2018      | WHO, CDC    |
|                    | Cortés                         | San Pedro Sula            | 15.508144 | -88.027036  | 2017, 2018      | WHO, CDC    |
|                    | Francisco Morazán              | Tegucigalpa               | 14.074236 | -87.200512  | 2017, 2018      | WHO, CDC    |

## 204 Mosquito sampling

205 Mosquito collections and bioassays were performed throughout the duration of the  
206 Zika AIRS Project (2016 – 2019). Local populations of *Ae. aegypti* were sampled  
207 from ZAP's sentinel sites in each country using two approaches: (i) larval collections  
208 from multiple houses and neighborhoods (n= 5-10), and (ii) ovitraps set in multiple  
209 premises per sentinel site (n= 5-10). Larval collections were performed by using  
210 pipettes and nets, and then transported to insectaries where specimens were reared  
211 to the adult stage. Larvae were fed with macerated fish or dog food pellets, with daily

212 maintenance. Pupae were transferred to labeled mosquito cages representing each  
213 sentinel sites. Adults were fed *ad libitum* a 10% sucrose solution soaked in cotton  
214 balls. The insectary conditions recorded were 70% - 95% of relative humidity, and a  
215 temperature range from 26 °C – 29 °C and a photo-period of 12:12.

216 The ovitraps used were black plastic containers of approximately 1L of capacity, half-  
217 filled with 10% hay infusion and with the interior wall lined with a paper towel or  
218 germination paper as the oviposition substrate (adapted from (46)). Ovitrap papers were  
219 distributed in five to ten houses at least 200 meters apart. Once the oviposition  
220 papers were transferred to the laboratories, five to ten ovitrap papers with eggs were  
221 combined and immersed in dechlorinated water for hatching. Larvae, pupae and  
222 adult breeding conditions were identical to the ones described above. Adult  
223 mosquitoes were confirmed to be *Ae. aegypti* after the insecticide resistance tests  
224 using external morphological features described in taxonomical keys (47). F0 and  
225 F1 adult mosquitoes obtained under controlled insectary conditions were utilized for  
226 IR testing using WHO and CDC international standardized methodologies in each  
227 country with ZAP implemented entomological surveillance.

## 228 **Insecticides**

229 The majority of the testing procedures were conducted between 2017 and 2018, with  
230 the exception of Haiti and Guatemala that completed the data during 2019. The  
231 detailed information on the exact months of collection and bioassays is available in  
232 the supplementary information (Supplementary information, Table S1).

233 All impregnated WHO papers with diagnostic concentrations (1x), intensity  
234 concentrations (5x and 10x the diagnostic dose), control papers and bioassay kits

235 were obtained directly from the University Saints Malaysia (Penang, Malaysia). The  
236 standard insecticide-impregnated papers with the diagnostic doses used were  
237 permethrin (0.25 %), deltamethrin (0.03 %), lambda-cyhalothrin (0.03 %), etofenprox  
238 (0.5 %), alpha-cypermethrin (0.03 %), malathion (0.8 %), pirimiphos-methyl (0.21 %)  
239 and bendiocarb (0.1 %).

240 The insecticides and bioassay kits used for the CDC bottle assays were donated by  
241 the Centers of Disease Control and Prevention (Atlanta, United States) and included  
242 permethrin (15 µg/ml), deltamethrin (10 µg/ml), lambda-cyhalothrin (10 µg/ml),  
243 etofenprox (12.5 µg/ml), malathion (50 µg/ml), pirimiphos-methyl (20 µg/ml) and  
244 bendiocarb (12.5 µg/ml). A complete list of insecticides and concentrations is  
245 provided in the supplementary information (Table S2).

#### 246 **WHO bioassays and CDC bottle assays**

247 Three-to-five day old female mosquitoes were separated for at least one hour in  
248 paper cups before the bioassays. In WHO standard bioassays, the WHO protocol  
249 was followed using each insecticide's diagnostic concentration for *Ae. aegypti* (48).  
250 At least four replicates with 25 mosquitoes each were used to test each insecticide,  
251 with at least one additional group exposed to control papers. After 60 minutes of  
252 exposure to insecticide, knockdown was recorded. Mortality was recorded 24 hours  
253 later.

254 The CDC standard IR bottle assays were performed according to the CDC guidelines  
255 (16). At least four replicates with 25 mosquitoes each were used to test each  
256 insecticide, with an additional group of 25 mosquitoes exposed only to the solvent in  
257 a separate bottle as a control. Knockdown was recorded every 15 minutes up to two  
258 hours, with the exception of the interval between 30 and 45 minutes where the

259 readings were done every 5 minutes. The diagnostic time for all insecticides tested  
260 in this study was 30 minutes.

261 With the multi-country dataset per methodology, a qualitative comparison between  
262 methodologies and the status of mosquito populations tested (resistant vs.  
263 susceptible) was conducted. To summarize the level of alignment in the multi-  
264 country susceptibility records, the level of agreement between results obtained with  
265 WHO vs. CDC bioassays were classified as: “same” when exposed mosquitoes  
266 under both methodologies resulted either in i) resistance ii) suspected resistance or  
267 iii) susceptibility; “similar” when one assay resulted in resistance and the other test  
268 results in suspected resistance; and “different” when results were interpreted as  
269 resistant populations under one methodology and susceptible populations with the  
270 other, or suspected resistance, in one and susceptible in the other.

### 271 **WHO intensity bioassays**

272 Standardized intensity bioassays (49) were adapted for *Aedes* with 5x and 10x the  
273 diagnostic concentrations of permethrin, deltamethrin and lambda-cyhalothrin, and  
274 were performed in El Salvador, Guatemala, Honduras and Haiti. Mortality values  
275 <98% with the 5x concentration indicates moderate resistance, while mortality  
276 values <98% with the 10x concentration suggest high intensity resistance.

277

### 278 ***Kdr* genotyping**

279 A molecular screening for *kdr* mutations was conducted in order to characterize the  
280 allelic frequencies of four target site mutations incriminated in pyrethroid resistance  
281 of *Aedes aegypti* mosquitoes in Guatemala, El Salvador, Honduras, Haiti and

282 Dominican Republic. Target mutations examined included I1011V, I1011M, F1534C  
283 and V1016I (11).

284 Molecular screening for *kdr* mutations I1011V, I1011M, F1534C and V1016I utilized  
285 DNA amplification and sequencing. For the DNA extraction the Rapid Alkaline DNA  
286 Extraction protocol was employed (50). Additionally, all amplification reactions  
287 included 25 µl total volume in 96-well PCR plates (Dot Scientific) in a Mastercycler  
288 Gradient thermocycler (Eppendorf). Each reaction contained 1X Taq buffer (50 mM  
289 KCl, 10 mM Tris pH 9.0, 0.1% Triton X), 1.5 mM MgCl<sub>2</sub>, 200 µM dNTPs, 5 pmoles  
290 of each primer (except where noted), 1 unit of Taq DNA polymerase, and 3 µl of  
291 genomic DNA. PCR products were size fractionated by electrophoresis in 4%  
292 agarose gels stained with SybrSafe®, and visualized under UV light.

293 The mutation presence was characterized by using a primer multiplex to differentiate  
294 the wild-type from mutant individuals based on differences in amplicon size. The  
295 primers used for detecting each mutation are included as supplementary information  
296 (protocol for molecular testing in supplementary information, S3, S4). Sequencing of  
297 amplified fragments using both PCR primers was performed to confirm PCR results  
298 for the I1011V/M mutation (supplementary information, table S3.1).

299 For the molecular screening, the sample of *Ae. aegypti* individuals for each country  
300 consisted of 300 mosquitoes from Dominican Republic, and 150 individuals  
301 respectively for the rest of countries. For each lot of individuals, specimens were  
302 classified as survivors and non-survivors during the WHO tests using diagnostic  
303 concentrations of permethrin, lambda-cyhalothrin and deltamethrin. All molecular  
304 procedures were conducted in the Lobo Lab at the University of Notre Dame,

305 Indiana, USA. The mosquito populations screened correspond to Higuey and  
306 Manoguayabo municipalities (Santo Domingo East) in Dominican Republic,  
307 Dessources in Haiti, San Sebastian in El Salvador, Tegucigalpa in Honduras and  
308 Zacapa city in Guatemala.

309

## 310 **Results**

### 311 **WHO bioassays**

312 *Aedes aegypti* populations showed widespread resistance to all five pyrethroids  
313 tested (alpha-cypermethrin, deltamethrin, etofenprox, lambda-cyhalothrin, and  
314 permethrin) during the three-year monitoring program (Figure 2). Although mortality  
315 varied within and across countries, all populations demonstrated clear loss of  
316 pyrethroid susceptibility (<90% mortality). The intensity of the resistance to  
317 permethrin in El Salvador and Guatemala was high (10x the diagnostic concentration  
318 did not kill >98% of mosquitoes), while in Honduras resistance to permethrin was  
319 moderate (Figure 3). For lambda-cyhalothrin, Guatemala's populations showed high  
320 intensity of resistance, while in Honduras the only population categorized as  
321 moderate resistance was San Pedro Sula. In El Salvador all the exposed populations  
322 displayed moderate resistance, except Santa Rita. Finally, deltamethrin resistance  
323 in the region ranged between low to high intensity (Figure 3).

324

325 **Figure 2.** Mortality of *Ae. aegypti* to five pyrethroids obtained with WHO kits and  
326 diagnostic doses, the tested mosquito populations represent samples from  
327 Dominican Republic, El Salvador, Guatemala, Haiti and Honduras. The horizontal

328 red dotted line represents 98% mortality which delimits the susceptibility threshold.  
329 Values between 98% and 90% mortality are interpreted as suspected resistance,  
330 and values below 90% mortality are interpreted as resistant to the corresponding  
331 insecticide. Note: alpha-cypermethrin was not tested in Dominican Republic and  
332 Haiti; lambda-cyhalothrin was not tested in Haiti.

333

334 **Figure 3.** Intensity of resistance in *Ae. aegypti* populations from El Salvador,  
335 Guatemala, Haiti and Honduras to the WHO kits using three pyrethroids, with 5x  
336 insecticide concentrations (lighter color) and 10x concentrations (darker color). The  
337 horizontal red dotted line represents 98% mortality which delimits susceptibility.  
338 Note: 10x concentrations were not tested in *Ae. aegypti* populations from Haiti, nor  
339 in San Sebastian, El Salvador.

340

341 Resistance to the organophosphates malathion and pirimiphos-methyl was also  
342 documented. Only the *Ae. aegypti* population from one sentinel site in Guatemala,  
343 San Agustin, was susceptible to malathion. In the case of pirimiphos-methyl only  
344 mosquitoes from the West province in Haiti (Dessources and Petite Riviere), plus  
345 Higuey in Dominican Republic, resulted as susceptible (Figure 4).

346

347 **Figure 4.** Mortality of *Ae. aegypti* populations from Dominican Republic, El Salvador,  
348 Guatemala, Haiti and Honduras when exposed to the organophosphates malathion  
349 and pirimiphos-methyl, using WHO methodology. The horizontal red dotted line  
350 represents 98% mortality and susceptibility threshold, between this threshold and  
351 the grey dotted line (90% mortality) values are interpreted as suspected resistance,



352 and values below 90% mortality are interpreted as resistant to the corresponding  
353 insecticide.

354

355 Bendiocarb was only tested by WHO assays in the Dominican Republic, Guatemala  
356 and Honduras. In Honduras and Guatemala all *Ae. aegypti* populations tested  
357 demonstrated susceptibility or suspected resistance (further molecular tests need to  
358 confirm findings), except for the population from Chiquimula site in Guatemala. In  
359 contrast, all bioassays from Dominican Republic showed resistance or suspected  
360 resistance to bendiocarb (Figure 5).

361

362 **Figure 5.** Mortality of *Ae. aegypti* populations from Dominican Republic, Guatemala,  
363 Haiti and Honduras when exposed to Bendiocarb, using WHO methodology. The  
364 horizontal red dotted line represents 98% mortality, and delimits the susceptibility  
365 threshold. Values between 98% mortality and the grey dotted line (90% mortality)  
366 are interpreted as suspected resistance, and values below 90% mortality are  
367 interpreted as resistant to the corresponding insecticide.

### 368 **CDC bottle bioassays**

369 All mosquito populations from the Dominican Republic and Guatemala were  
370 susceptible to deltamethrin (Figure 6). While in Honduras, three of five sites showed  
371 resistance, in El Salvador all populations showed resistance (Figure 6). Lambda-  
372 cyhalothrin susceptibility was present in some populations of Dominican Republic  
373 and Honduras, but the majority of the *Ae. aegypti* populations exposed were  
374 resistant or showed suspected resistance to lambda (no information from

375 Guatemala). Permethrin data, from El Salvador and Honduras, showed resistance  
376 of local populations to this insecticide (Figure 6).

377

378 **Figure 6.** Mortality of *Aedes aegypti* populations from Dominican Republic, El  
379 Salvador, Guatemala and Honduras when exposed to five pyrethroids, using CDC  
380 diagnostic doses and 30 minutes diagnostic time. The horizontal red dotted line  
381 represents 98% mortality threshold which delimits susceptibility; results recorded  
382 between this threshold and the grey dotted line (80% mortality) are interpreted as  
383 suspected resistance, and results below the 80% mortality are indicative of  
384 resistance to the corresponding insecticide.

385

386 The organophosphate susceptibility tests demonstrated malathion resistance in only  
387 two Honduran sites (Comayagua and San Pedro Sula), with another two sites  
388 recorded as suspected resistance (Choluteca and Danli) in Honduras and  
389 Chalatenango in El Salvador. Remaining mosquito populations tested showed  
390 susceptibility to malathion (Figure 7). Wide spread resistance to pirimiphos-methyl  
391 was documented in El Salvador, with site specific variation in susceptible and  
392 suspected resistance in the Dominican Republic and Honduras (Figure 7).

393

394 **Figure 7.** Mortality of *Aedes aegypti* populations from Dominican Republic, El  
395 Salvador and Honduras when exposed to organophosphates (malathion and  
396 pirimiphos-methyl), using CDC methodology. The horizontal red dotted line  
397 represents 98% mortality threshold which delimits susceptibility; results recorded  
398 between this threshold and the grey dotted line (80% mortality) are interpreted as

399 suspected resistance, and results below the 80% mortality are indicative of  
400 resistance to the corresponding insecticide.

401

402 Finally, all mosquito populations across countries showed full susceptibility to the  
403 carbamate bendiocarb, except in the population from San Pedro Sula, from  
404 Honduras, which indicated suspected resistance (83% mortality).

405

#### 406 **Comparison of WHO bioassays and CDC bottle bioassays**

407 The comparison between the susceptibility status of *Ae. aegypti* populations as  
408 determined with the CDC and WHO methods varied according to the insecticide  
409 tested. The results for exposed mosquitoes from Honduras and El Salvador,  
410 consistently documented resistance to permethrin and deltamethrin with both  
411 methods (Tables 2 and 3). However, the status of susceptibility in sample  
412 populations from Guatemala and Dominican Republic, showed radical differences  
413 when exposed to deltamethrin. For the populations exposed to lambda-cyhalothrin,  
414 we recorded similarities in findings across all countries, with some populations found  
415 as susceptible (Table 3).

416 **Table 2.** Comparison of susceptibility results in sample populations of Dominican  
417 Republic with the two standard methodologies to evaluate insecticide susceptibility  
418 (WHO vs. CDC). Green color= same; orange color= similar; red color= different;  
419 white color= tests were done with only one of the methodologies. Codes for study  
420 sites: Barah= Barahona; Dajab = Dajabon; Hig = Higuey; Mano = Manoguayabo;  
421 SCrist = San Cristobal; San Rami= Sanchez Ramirez; Santiago = Santiago de los  
422 Caballeros; VDuarte= Villa Duarte.

423

|                    | Dominican Republic |       |        |       |        |      |        |          |        |         |
|--------------------|--------------------|-------|--------|-------|--------|------|--------|----------|--------|---------|
| Insecticide        | Azua               | Barah | Dajab  | Hig   | Mano   | Moca | SCrist | San Rami | Santi  | VDuarte |
| Permethrin         |                    |       |        |       |        |      |        |          |        |         |
| Deltamethrin       | Red                | Red   | Red    | Red   | Red    | Red  | Red    | Red      | Red    | Red     |
| Lambda-cyhalothrin | Green              | Green | Yellow | Green | Yellow | Red  | Yellow | Yellow   | Green  | Yellow  |
| Pirimiphos-Methyl  | Red                | Red   | Red    | Red   | Yellow | Red  | Green  | Red      | Yellow | Yellow  |
| Malathion          | Red                | Red   | Red    | Red   | Red    | Red  | Red    | Red      | Red    | Red     |
| Bendiocarb         | Red                | Red   | Red    | Red   | Red    | Red  | Red    | Red      | Red    | Red     |

424

425 **Table 3. Comparison of susceptibility results in sample populations of El**  
 426 **Salvador, Guatemala and Honduras with the two standard methodologies to**  
 427 **evaluate insecticide susceptibility (WHO vs. CDC).** Green color= same; orange  
 428 color= similar; red color= different; white color= tests were done with only one of the  
 429 insecticides. Codes of site names: Chal= Chalatenango; Mej= Mejicanos; SSebas=  
 430 San Sebastian; SRita= Santa Rita; Vera= Verapaz; Chiqui= Chuiquimula; SAgust=  
 431 San Agustin; Cholu= Choluteca; Comay= Comayagua; SPS= San Pedro Sula;  
 432 Tegus= Tegucigalpa. Note: In Guatemala only deltamethrin was used with both  
 433 methods, while in Haiti no insecticide was used with both methods -alpha-  
 434 cypermethrin was only carried out using the WHO method thus Haiti was not  
 435 included in the comparison.

436

|              | El Salvador |       |        |       |       | Guatemala |        |        | Honduras |        |        |       |        |
|--------------|-------------|-------|--------|-------|-------|-----------|--------|--------|----------|--------|--------|-------|--------|
| Insecticide  | Chal        | Mej   | SSebas | SRita | Vera  | Chiqui    | SAgust | Zacapa | Cholu    | Comay  | Danli  | SPS   | Tegus  |
| Permethrin   | Green       | Green | Green  | Green | Green |           |        |        | Green    | Green  | Yellow | Green | Yellow |
| Deltamethrin | Green       | Green | Green  | Green | Green | Red       | Red    | Red    | Green    | Yellow | Yellow | Green | Green  |

|                    |        |        |       |        |       |     |       |     |        |        |        |       |        |
|--------------------|--------|--------|-------|--------|-------|-----|-------|-----|--------|--------|--------|-------|--------|
| Lambda-cyhalothrin | Yellow | Yellow | Green | Green  | Green |     |       |     | Red    | Green  | Yellow | Green | Yellow |
| Etofenprox         | Green  | Green  | Green | Green  | Green |     |       |     |        |        |        |       |        |
| Pirimiphos-Methyl  | Green  | Green  | Green | Yellow | Green |     |       |     | Red    | Yellow | Yellow | Green | Red    |
| Malathion          | Yellow | Red    | Red   | Red    | Red   |     |       |     | Yellow | Green  | Yellow | Green | Red    |
| Bendiocarb         |        |        |       |        |       | Red | Green | Red | Green  | Green  | Red    | Green | Red    |

437

438 WHO and CDC assays testing the susceptibility of mosquito populations to the  
 439 organophosphate malathion showed contrasting results for most of El Salvador and  
 440 Dominican Republic samples and one site in Honduras. The recorded susceptibility  
 441 of *Ae. aegypti* populations to Pirimiphos-methyl showed more congruent results  
 442 among sites in El Salvador, with more contrasting sites in Honduras and the  
 443 Dominican Republic. Finally, the comparison between the testing with the carbamate  
 444 bendiocarb showed contrasting data for the Dominican Republic populations, while  
 445 only two sites in Honduras and two sites in Guatemala showed incongruence in the  
 446 data (Figure 8). In almost all the cases displayed in figure 8, where a difference or  
 447 contrasting results were found with the two methodologies, CDC tests diagnosed  
 448 susceptibility in the exposed populations while WHO tests diagnosed resistance or  
 449 suspected resistance in the same site.

450

451

#### 452 ***Kdr* genotyping**

453 Target mutations studied comprised I1011V, I1011M, F1534C and V1016I. All  
 454 samples (whether resistant or susceptible after WHO testing), were diagnosed as  
 455 having the wild-type allele for I1011V. Forty-five of these samples, representing both

456 survivors and non-survivors, were sequenced to ensure that the assay was  
457 functioning as expected. Sequence alignment are presented as supplementary  
458 information (S3). Sequencing determined that the processed samples had the wild-  
459 type allele for I1011V demonstrating the validity of the assay. These samples were  
460 also identified as wild-type for the I1011M allele - since they would have resulted in  
461 'wild-type' results for the PCR assay (demonstrated definitively with the sequencing);  
462 therefore, these PCRs were not performed for I1011M and all mosquitoes were  
463 considered wild type for that allele too.

464 The majority of individuals across sampled countries were heterozygous for the  
465 F1534C mutation, regardless of its status of resistant or susceptible to any of the  
466 three insecticides (Figure 8). In Higuey (DR) there was a presence of homozygous  
467 mutation, but it was present in similar percentages in resistant and susceptible  
468 mosquitoes. A high number of homozygotes were found in Manogwayabo (DR) and  
469 Honduras, mainly related to susceptibility to permethrin and deltamethrin  
470 respectively. In contrast, all mosquitoes that were killed by lambda-cyhalothrin in  
471 Haiti were wild-type homozygous (Figure 8).

472 **Figure 8.** F1534C *kdr* genotyping in *Ae. aegypti* populations from countries of  
473 Central America and the Caribbean. The populations screened for the F1534C *kdr*  
474 mutation include Higuey (DR-H), Manogwayabo (DR-M), San Sebastian (ES),  
475 Chiquimula (GT), Dessources (HT) and Tegucigalpa (HD). The numbers on top of  
476 each bar are the number of mosquitoes that showed the respective genotype.

477

478 In general, the presence of the V1016I mutated allele indicates a raise in tolerance  
479 to all three pyrethroids (Figure 9). All mosquitoes that were wild-type for V1016I were  
480 diagnosed as susceptible for lambda-cyhalothrin in both the Dominican Republic and  
481 the Haiti mosquito populations (Figure 9). Similarly, all wild-type mosquitoes in  
482 Honduras were susceptible to permethrin.

483 **Figure 9.** V1016I *kdr* mutation genotyping on *Ae. aegypti* population from countries  
484 of Central America and the Caribbean. The tested populations included Higuey (DR-  
485 H), Manoguayabo (DR-M), San Sebastian (ES), Chiquimula (GT), Dessources (HT)  
486 and Tegucigalpa (HD). The numbers on top of each bar are the number of  
487 mosquitoes that showed the respective genotype.

488

## 489 Discussion

490 Despite dengue hyperendemicity in the Central America and Caribbean region, and  
491 the chikungunya and Zika epidemics, governments struggle to implement insecticide  
492 monitoring and surveillance programs to inform IVM activities. Several factors in the  
493 public health scenario of the sampled countries have resulted in gaps in mosquito  
494 surveillance, which translates into a lack of data on the insecticide susceptibility of  
495 *Ae. aegypti* mosquitoes towards decision-making. The complex scenario of public  
496 health involves competing demands for massive insecticide applications, due to  
497 political and social pressures, and the weak technical and logistical capacity of the  
498 national programs that deliver only sporadic and limited actions to prevent and  
499 control arboviruses transmission. Prior to the implementation of the Zika AIRS  
500 Project, none of the five countries included in this study had functioning programs

501 that monitored insecticide resistance in Zika vectors. Additionally, this study follows  
502 the path of only few previous studies that have explored the molecular mechanisms  
503 of insecticide resistance present in the region (51-53) and is the only study that raises  
504 technical issues regarding the dual internationally-accepted system of detecting and  
505 reporting insecticide resistance that might result in contrasting outcomes.

506

### 507 **Insecticide resistance and intensity**

508 Resistance to the pyrethroid permethrin is present in the vast majority of mosquito  
509 populations across countries, independently of the method of use. As a matter of  
510 fact, permethrin has been one of the most widely used insecticides to control *Ae.*  
511 *aegypti* due, in part, to the market availability and lower cost (54, 55). That is not the  
512 case with etofenprox, a pseudo-pyrethroid that is seldom employed in vector control  
513 operations in the region; however, resistance levels to etofenprox were also  
514 documented in this study. The selective pressure by permethrin (39) and possible  
515 cross-resistance mechanisms product of decades of use of DDT (56, 57) in the  
516 region are likely the cause of this widespread resistance. Additionally, permethrin is  
517 a type I pyrethroid, which can dissociate faster from the voltage-mediated sodium  
518 channels (VMSC), hence being more likely to originate resistance than pyrethroids  
519 type II, which block the channels several seconds longer (58).

520

521 The status of *Ae. aegypti* susceptibility to deltamethrin and lambda-cyhalothrin in the  
522 sampled countries was highly dependent of the method of testing. The CDC bottle  
523 assays demonstrated either susceptibility or suspected resistance, while WHO  
524 bioassays tended to result in resistance (contrary to previous research (59)).



525 Deltamethrin is a widely used insecticide in the whole region, applied mainly through  
526 ULV fogging and other types of spraying aiming to control adult populations of *Ae.*  
527 *aegypti*, so a resistant status was likely (11, 60, 61). Although lambda-cyhalothrin is  
528 not used as much as deltamethrin, examples of cross-resistance are reported in  
529 literature (62, 63), notwithstanding, both of them are type II alpha-cyano pyrethroids  
530 (64).

531 According to the results obtained with the WHO tests, resistance to the  
532 organophosphates malathion and pirimiphos-methyl is ubiquitous in the sampled *Ae.*  
533 *aegypti* populations. Malathion is considered the second choice of preference after  
534 deltamethrin, and is currently used in replacement of deltamethrin as a strategy for  
535 insecticide resistance management (60, 65, 66). Malathion has been also more  
536 recently been used in the Latin American region, so there is no surprise if loss of  
537 susceptibility is reflected in the results. Additionally, the region has been using the  
538 organophosphate temephos as the frontline chemical tool to control *Ae. aegypti*  
539 larvae, using several tons per year across countries (82 metric tons of  
540 organophosphates were used in larviciding between 2000-2009 in the Americas  
541 (67)). In a separate publication, parallel to this study, temephos resistance was also  
542 evaluated and is present in the Central American countries included here (data not  
543 included). Although this has previously been debated, it is possible that the selective  
544 pressure and resistance emergence in larvae can be transferred to adult mosquitoes  
545 against the same insecticide family (68-70). As pirimiphos-methyl is scarcely used  
546 in the region, resistance to this product could be a cross-resistance phenomenon  
547 stemming from the continuous and wide spread use of temephos (26, 71, 72).

548 Resistance to malathion and pirimiphos methyl have been reported elsewhere (21,  
549 73-75), and in the LAC region (26, 36, 71, 76-81).

550 Bendiocarb was the only carbamate tested in this study. Although it is not used in  
551 ULV applications, it may be used for indoor residual spraying (IRS) to deliver residual  
552 killing. IRS is being tested against *Ae. aegypti*, so the susceptibility level is  
553 particularly relevant. CDC bottle assays resulted in complete susceptibility in all  
554 mosquito populations, while WHO bioassays suggested some resistant populations  
555 in Honduras and widespread resistance in Dominican Republic (the only two  
556 countries to use bendiocarb with both methodologies). These contrasting results  
557 between CDC and WHO diagnostic doses resulting in confirmation of resistance or  
558 susceptibility being impossible, with the most conservative conclusion being that  
559 bendiocarb resistance is suspected.

560

561 WHO intensity bioassays performed in El Salvador and Honduras showed that *Ae.*  
562 *aegypti* populations tested in those countries have a high intensity resistance to  
563 permethrin, and moderate to high intensity resistance to deltamethrin and lambda-  
564 cyhalothrin. Resistance to pirimiphos methyl in both countries was classified as  
565 moderate. Monitoring the intensity of insecticide resistance regularly is essential in  
566 measuring goals of insecticide resistance management, to offer information on  
567 potential operational failure and optimize resources in a mosquito control program  
568 by selecting the most appropriate insecticides.

569 The documentation of susceptible mosquito populations to certain insecticides in the  
570 region, or that we might be overestimating deltamethrin resistance, and that CDC  
571 diagnostic dose is realistic, is hopeful. The susceptibility of different mosquito

572 populations given a different biological and population genetics background is  
573 variable, therefore re-formulation of diagnostic doses obtained with different  
574 reference mosquito populations might be needed. Even more, a technique that links  
575 resistance with operational failure could be envisioned as essential insecticide  
576 product information for future formulations. In the face of uncertainty on the  
577 susceptibility status, the best choice is to follow an insecticide resistance  
578 management approach, continue routine monitoring and evaluating the insecticide  
579 products used in vector control operations (12, 82).

580

#### 581 **Mechanisms of pyrethroid resistance: *kdr* screening**

582 Mechanisms of insecticide resistance act in different ways: while target site  
583 mutations would result probably in knockdown and recovery (due to rapid  
584 dissociation of the insecticide molecules in the voltage-gated sodium channel),  
585 enzymatic resistance would probably result in mosquitoes tolerating the insecticide  
586 and not being knocked down. Since the WHO and the CDC methodologies main  
587 measures are mortality and knockdown respectively, exploring the presence of *kdr*  
588 mutations could contribute to explain the discordance between methods; however,  
589 in this study only mosquitoes used in WHO assays were genotyped, so the  
590 arguments definitely will need further validation.

591 All mosquitoes screened resulted as wild-type for the I1011V and I1011M mutations,  
592 and most of the mosquitoes screened were heterozygous for the F1534C mutation,  
593 regardless of the susceptible or resistant status to the WHO diagnostic doses of  
594 permethrin, deltamethrin and lambda-cyhalothrin. Interestingly, there was an

595 increase of allelic frequency of the V1016I mutation in mosquitoes that survived the  
596 three pyrethroids across all countries. In *Ae. aegypti*, several *kdr* mutations have  
597 been linked with pyrethroid resistance. In particular the mutations D1763Y, F1534C,  
598 G923V, I1011M, I1011V, L982W, S989P, V1016G, V1016I, T1520I and V410L (29,  
599 57, 83-86). In America, *kdr* mutations have been reported in *Ae. aegypti* populations  
600 from Ecuador, (22), United States (23, 24), Colombia (25, 26), México (27-29), Brazil  
601 (30-35), Lesser Antilles (36-40), French Guiana (37), Venezuela (29, 41), Cuba (29,  
602 39), Panamá (42), Puerto Rico (43). This is the first report of *kdr* mutations for the  
603 countries included in this study, except for Haiti (87).

604 Resistance to pyrethroids in mosquitoes have been widely associated with the  
605 F1534C (21, 23, 25, 27, 29, 30, 32, 39-41, 83, 88-101) and V1016I mutations (24,  
606 25, 27, 29, 30, 32, 36, 38, 40, 41, 88, 93, 97, 100, 102, 103). The simultaneous  
607 presence of both mutations has been associated with enhanced tolerance to  
608 deltamethrin in the past (31). However, the relationship between both mutations in  
609 relation to resistance is not clear. The fact that most of individuals are heterozygous  
610 for F1534C seems to indicate that its presence is not associated with resistance -  
611 although the theory that it is contributing to resistance in association with other  
612 mutations cannot be discarded. Other mutations such as G923V, (reported in the  
613 Americas (29, 57, 84, 86, 93)) and S989P, have been reported to be associated with  
614 resistance when in combination with other mutations (98, 99, 104), were not  
615 screened in this study but should be considered for future work.

616

617 **Differences between the WHO and CDC susceptibility classifications**

618 When a country designs an insecticide resistance monitoring program, it usually  
619 selects one of the two available standardized methodologies: WHO or CDC. Based  
620 on those results, decisions are made on insecticide selection to guide public health  
621 program implementation. In the Latin American region, the CDC bottle assays are  
622 more commonly used mainly because the procurement process it's easier.  
623 Conversely, WHO kits and insecticide impregnated papers are generally more  
624 difficult to obtain in the Americas because of geographic distance with Malaysia,  
625 language barriers, problematic procurement processes, etc. (59, 105). In addition,  
626 there are claims of quality loss of the impregnated papers in the transportation  
627 process. However, both methods are conventionally considered to be equally valid  
628 and hypothetically should offer similar information on mosquito susceptibility. In this  
629 study both methods were used on the same mosquito populations across 5 countries  
630 resulting in contrasting susceptibility classification. This is at best confusing and does  
631 not orient countries on which method to use. Thus it begs the question, is the  
632 information provided by each method different at its core, or does it refer to the same  
633 insecticide susceptibility concept?

634 WHO testing employs insecticide impregnated filter papers, diluted in oil (OPs and  
635 CA) or alcohols (PYR). The papers are impregnated with diagnostic doses, which  
636 are supposed to kill 100% of susceptible mosquitoes. Impregnated papers have an  
637 expiry date that lasts 1 year (106), and can be used 6 times maximum only. There  
638 are reports of loss of effectiveness of the insecticide impregnated papers only after  
639 4 uses (107). Exposure time is likely to vary between each mosquito because there  
640 are areas of the WHO-kit cylinder that are not covered on insecticide (59); however,  
641 in the case of insecticides with repellent properties, mosquitoes tend to behave

642 actively and fly within the cylinder, disturbing other mosquitoes and forcing exposure.  
643 CDC testing uses fully-coated insecticide bottles, so mosquitoes are continuously  
644 exposed no matter if they fly or not. All type of insecticides are diluted in alcohols  
645 and bottles are coated usually a few days or the same day before the test; according  
646 to the guidelines, organophosphates and carbamates degrade faster than  
647 pyrethroids. It is not clear how these methodological differences might affect the  
648 response of mosquitoes to the insecticide doses.

649 Comparing dosage equivalences in CDC bottle assays and WHO bioassays is close  
650 to impossible, because the insecticide is delivered in distinct ways (concentration on  
651 surface versus concentration percentage) and there is no way to measure how much  
652 insecticide an insect is actually exposed to. However, both methodologies are  
653 believed to offer the same basic dual outcome: resistance or susceptibility. This is  
654 where differences in the final outcome are problematic, even if it's understood that  
655 there are methodological differences. Thus, the central problem is not that there are  
656 technical differences between both methods, but that the outcomes for the same  
657 mosquito population can be *different* (17).

658

659 One of the potential causes of difference resides in the original mosquito strains used  
660 for calibrating the diagnostic doses. As it was mentioned, each organization used  
661 several susceptible mosquito strains to test a range of insecticide concentrations and  
662 calculate the diagnostic dose (defined by WHO as the double of the lethal  
663 concentration 99, i.e. the double of the concentration that kills 99% of susceptible  
664 mosquitoes). Those mosquito populations (named Rockefeller, New Orleans,  
665 Liverpool, and others) had their own genetic and phenotypic background, and there

666 are possibilities that they respond differently to the diagnostic concentrations than  
667 current natural mosquito populations. Also, some of those strains have been through  
668 several re-colonization processes, bottlenecks and inbreeding for decades (108,  
669 109). Ideally, each country should establish a susceptibility baseline and monitor the  
670 evolution of resistance in comparison to that baseline, but the reality is that 1) there  
671 are virtually no mosquito populations that have not been exposed to insecticides or  
672 other type of xenobiotics and 2) it is likely that the capacity of governments to perform  
673 that task is not up to the task, at least for the immediate future.

674 There are other relevant questions that have been discussed in comparing both  
675 methodologies. For example, some differences such as the angle in which the WHO  
676 cylinders are kept during the bioassay might change the outcomes (15). The use of  
677 single diagnostic concentrations in a world where resistance to some insecticides is  
678 almost universal is barely informative. The employment of intensity diagnostic  
679 concentrations (5x and 10x) is a step forward, but it is likely that a deeper dive into  
680 understanding the nature of insecticide as a multi-dimensional biological treat will be  
681 needed in order to extrapolate knowledge into clear and practical actions to prevent  
682 and manage insecticide resistance.

683 The contrasting results obtained between WHO and CDC methodologies for IR  
684 testing in this study ask a vital and outstanding question: *What methodology and*  
685 *entomological endpoints can be standardized and are adequate to decide whether*  
686 *there is resistance to an insecticide towards decision-making?* Ideally, each country  
687 should have developed susceptibility baselines and calculated diagnostic  
688 concentrations based on those, but given the current distribution and level of  
689 resistance, and even the history of DDT usage, and potential cross-resistance, such

690 a task is clearly challenging. Perhaps the best solution, is to use both methods, and  
691 if insecticide resistance is found for at least one of them, that result should be the  
692 conservative verdict. However, countries in the region barely have resources and  
693 capacity (funding, variability in testing procedures, required training, mosquito  
694 rearing facilities, bioassay degradation, etc.) to do just one of them This is a clear  
695 opportunity for which the regional and international health authorities should aim  
696 future studies and guidelines to support countries in the process of understanding  
697 the information coming from the available tools.

### 698 **Limitations**

699 This study was performed over a period of time spanning 2.5 years. Insecticide  
700 resistance in mosquito populations is a highly plastic in nature – varying based on  
701 the insecticide selective pressure (frequency, type of insecticide, etc.), population  
702 genetics, and other factors, hence, it was expected that the presence and intensity  
703 of resistance demonstrated temporal variation.

704 As any multi-country study of this proportion, and despite the supervision and  
705 continuous training, it is possible that the quality of a small portion of the dataset did  
706 not meet stringent standards expected. However, since these bioassays were  
707 performed in optimal conditions and by trained people, and that they represent real  
708 data that goes towards decision-making for Ministries of Health, the outcomes and  
709 results are valid for all implementation partners. In addition, due to time constraints,  
710 human resources and insecticide priorities, all insecticides could not be tested using  
711 both methods in all sites across countries.



712 Only susceptible and resistant mosquitoes were genotyped in the WHO bioassays.  
713 Genotyping mosquitoes from the CDC bioassays could be a good opportunity to link  
714 target site mutations with the contrasting results between methodologies.

#### 715 **Final recommendations**

716 Based on these results, the Ministries of Health of El Salvador, Guatemala,  
717 Honduras, Haiti and Dominican Republic should establish national networks for  
718 insecticide resistance surveillance and management of *Ae. aegypti*. Additionally, a  
719 technical evaluation of the effectiveness of commercial insecticides for ULV  
720 deployment that contain any pyrethroid or organophosphate is urgently needed,  
721 particularly those containing permethrin or etofenprox and any insecticide that  
722 resulted in a mosquito population survival to the 10x diagnostic dose (high level of  
723 resistance). Ideally, these would include epidemiological indicators in addition to  
724 entomological ones typically used. The specific tools used to establish the insecticide  
725 resistance management networks, that can include insecticide rotations, mosaics or  
726 combinations with other molecules, must be discussed and standardized in an inter-  
727 disciplinary context with the technical support of international organizations such as  
728 the Pan American Health Association (PAHO), and according to the technical and  
729 logistical capacities of each country.

730 This study suggests the widespread nature of at least one mutation related to  
731 pyrethroid resistance in the region. Ministries of Health, in association with academic  
732 institutions and international collaboration should monitor V1016 I and F1534C  
733 mutation frequency on an annual basis. This would provide insight on the evolution  
734 of this mechanism of resistance through the years of an insecticide resistance  
735 management program. Other mutations reported elsewhere in the literature, and

736 future sequencing studies with samples from the LAC region are needed to better  
737 understand the evolution, distribution and molecular determinants of resistance. A  
738 successful insecticide application program, by default, would change transmission  
739 and vector population dynamics – including IR. Monitoring and surveillance would  
740 enable the timely adaptation and implementation of appropriate methodologies or  
741 molecules that fight this evolving paradigm.

742 Organizations such as the CDC and WHO/PAHO should work collaboratively in the  
743 unified release of revised diagnostic doses and adjusted methodologies. The current  
744 doses for *Ae. aegypti* can result in contradicting results, which is at best confusing  
745 for the institutions making decisions in public health.

746

## 747 **Acknowledgements**

748 We would like to acknowledge the generous support provided by Audrey Lenhart  
749 and Lucrecia Vizcaino from the Centers for Disease Control and Prevention,  
750 Insecticide Resistance and Vector Control Team, Center for Global Health, Division  
751 of Parasitic Diseases and Malaria, Entomology Branch, throughout the  
752 implementation period of the ZIKA AIRS project. Special thanks to all the Ministries  
753 of Health of El Salvador, Guatemala, Honduras, the Dominican Republic and Haiti,  
754 for their active collaboration and input. This study could not have been conducted  
755 without the administrative and finance team of the ZIKA AIRS project, and  
756 colleagues like Paula Wood, Kassim Mohammued, Alex Stanchfield, Carmen  
757 Vilanova, Carlos Cardenas, Richard Fisher and Patricio Murgueytio, who

758 consistently supported procurement orders, distribution and customs release  
759 processes of all entomological tools and supplies for the various countries.

760

## 761 **References**

- 762 1. Bhatt S, Gething PW, Brady OJ, Messina JP, Farlow AW, Moyes CL, et al. The global  
763 distribution and burden of dengue. *Nature*. 2013;496(7446):504-7.
- 764 2. Wahid B, Ali A, Rafique S, Idrees M. Global expansion of chikungunya virus: mapping the 64-  
765 year history. *Int J Infect Dis*. 2017;58:69-76.
- 766 3. Brady OJ, Gething PW, Bhatt S, Messina JP, Brownstein JS, Hoen AG, et al. Refining the global  
767 spatial limits of dengue virus transmission by evidence-based consensus. *PLoS Negl Trop Dis*.  
768 2012;6(8):e1760.
- 769 4. Samarasekera U, Triunfol M. Concern over Zika virus grips the world. *The Lancet*.  
770 2016;387(10018):521-4.
- 771 5. Pan American Health Organization, PLISA Health Information Platform for the Americas.  
772 Dengue Incidence rate for Subregions of the Americas. Data reported by Health Ministries of the  
773 countries. 2019.
- 774 6. Carvalho FD, Moreira LA. Why is *Aedes aegypti* Linnaeus so Successful as a Species? *Neotrop*  
775 *Entomol*. 2017;46(3):243-55.
- 776 7. Ryan SJ, Carlson CJ, Mordecai EA, Johnson LR. Global expansion and redistribution of *Aedes*-  
777 borne virus transmission risk with climate change. *PLoS Negl Trop Dis*. 2019;13(3):e0007213.
- 778 8. Achee NL, Grieco JP, Vatandoost H, Seixas G, Pinto J, Ching-Ng L, et al. Alternative strategies  
779 for mosquito-borne arbovirus control. *PLoS Negl Trop Dis*. 2019;13(1):e0006822.
- 780 9. WHO. Handbook for Integrated Vector Management. 2012.
- 781 10. Bonds JA. Ultra-low-volume space sprays in mosquito control: a critical review. *Med Vet*  
782 *Entomol*. 2012;26(2):121-30.
- 783 11. Moyes CL, Vontas J, Martins AJ, Ng LC, Koou SY, Dusfour I, et al. Contemporary status of  
784 insecticide resistance in the major *Aedes* vectors of arboviruses infecting humans. *PLoS Negl Trop*  
785 *Dis*. 2017;11(7):e0005625.
- 786 12. Roiz D, Wilson AL, Scott TW, Fonseca DM, Jourdain F, Muller P, et al. Integrated *Aedes*  
787 management for the control of *Aedes*-borne diseases. *PLoS Negl Trop Dis*. 2018;12(12):e0006845.
- 788 13. Hemingway J. Vectors: recognising the challenge and reducing neglect. *Int Health*.  
789 2019;11(5):341-3.
- 790 14. World Health Organization. Global report on insecticide resistance in malaria vectors: 2010  
791 - 2016. Geneva: World health organization; 2018.
- 792 15. World Health Organization. Monitoring and Managing Insecticide resistance in *Aedes*  
793 Mosquito Populations. Interine Guidance for Entomologists. Geneva: World Health Organization;  
794 2016.
- 795 16. Brogdon BG, Chan A. Guideline for Evaluating Insecticide Resistance in Vectors Using the  
796 CDC Bottle Bioassay. In: Prevention CfDca, editor. 2010.
- 797 17. Owusu HF, Jancaryova D, Malone D, Muller P. Comparability between insecticide resistance  
798 bioassays for mosquito vectors: time to review current methodology? *Parasit Vectors*. 2015;8:357.

- 799 18. Pittendrigh B, Reenan R, French-Constant RH, Ganetzky B. Point mutations in the *Drosophila*  
800 sodium channel gene para associated with resistance to DDT and pyrethroid insecticides. *Mol Gen*  
801 *Genet.* 1997;256(6):602-10.
- 802 19. Williamson MS, Martinez-Torres D, Hick CA, Devonshire AL. Identification of mutations in  
803 the housefly para-type sodium channel gene associated with knockdown resistance (kdr) to  
804 pyrethroid insecticides. *Mol Gen Genet.* 1996;252(1-2):51-60.
- 805 20. Williamson MS, Denholm I, Bell CA, Devonshire AL. Knockdown resistance (kdr) to DDT and  
806 pyrethroid insecticides maps to a sodium channel gene locus in the housefly (*Musca domestica*).  
807 *Mol Gen Genet.* 1993;240(1):17-22.
- 808 21. Ishak IH, Jaal Z, Ranson H, Wondji CS. Contrasting patterns of insecticide resistance and  
809 knockdown resistance (kdr) in the dengue vectors *Aedes aegypti* and *Aedes albopictus* from  
810 Malaysia. *Parasit Vectors.* 2015;8:181.
- 811 22. Ryan SJ, Mundis SJ, Aguirre A, Lippi CA, Beltran E, Heras F, et al. Seasonal and geographic  
812 variation in insecticide resistance in *Aedes aegypti* in southern Ecuador. *PLoS Negl Trop Dis.*  
813 2019;13(6):e0007448.
- 814 23. Kandel Y, Vulcan J, Rodriguez SD, Moore E, Chung HN, Mitra S, et al. Widespread insecticide  
815 resistance in *Aedes aegypti* L. from New Mexico, U.S.A. *PLoS One.* 2019;14(2):e0212693.
- 816 24. Estep AS, Sanscrainte ND, Waits CM, Bernard SJ, Lloyd AM, Lucas KJ, et al. Quantification of  
817 permethrin resistance and kdr alleles in Florida strains of *Aedes aegypti* (L.) and *Aedes albopictus*  
818 (Skuse). *PLoS Negl Trop Dis.* 2018;12(10):e0006544.
- 819 25. Maestre-Serrano R, Pareja-Loaiza P, Gomez Camargo D, Ponce-Garcia G, Flores AE. Co-  
820 occurrence of V1016I and F1534C mutations in the voltage-gated sodium channel and resistance to  
821 pyrethroids in *Aedes aegypti* (L.) from the Colombian Caribbean region. *Pest Manag Sci.* 2018.
- 822 26. Maestre-Serrano R, Gomez-Camargo D, Ponce-Garcia G, Flores AE. Susceptibility to  
823 insecticides and resistance mechanisms in *Aedes aegypti* from the Colombian Caribbean Region.  
824 *Pestic Biochem Physiol.* 2014;116:63-73.
- 825 27. Lopez-Monroy B, Gutierrez-Rodriguez SM, Villanueva-Segura OK, Ponce-Garcia G, Morales-  
826 Forcada F, Alvarez LC, et al. Frequency and intensity of pyrethroid resistance through the CDC bottle  
827 bioassay and their association with the frequency of kdr mutations in *Aedes aegypti* (Diptera:  
828 Culicidae) from Mexico. *Pest Manag Sci.* 2018.
- 829 28. Deming R, Manrique-Saide P, Medina Barreiro A, Cardena EU, Che-Mendoza A, Jones B, et  
830 al. Spatial variation of insecticide resistance in the dengue vector *Aedes aegypti* presents unique  
831 vector control challenges. *Parasit Vectors.* 2016;9:67.
- 832 29. Saavedra-Rodriguez K, Urdaneta-Marquez L, Rajatileka S, Moulton M, Flores AE, Fernandez-  
833 Salas I, et al. A mutation in the voltage-gated sodium channel gene associated with pyrethroid  
834 resistance in Latin American *Aedes aegypti*. *Insect Mol Biol.* 2007;16(6):785-98.
- 835 30. Garcia GA, David MR, Martins AJ, Maciel-de-Freitas R, Linss JGB, Araujo SC, et al. The impact  
836 of insecticide applications on the dynamics of resistance: The case of four *Aedes aegypti* populations  
837 from different Brazilian regions. *PLoS Negl Trop Dis.* 2018;12(2):e0006227.
- 838 31. Brito LP, Carrara L, de Freitas RM, Lima JBP, Martins AJ. Levels of Resistance to Pyrethroid  
839 among Distinct kdr Alleles in *Aedes aegypti* Laboratory Lines and Frequency of kdr Alleles in 27  
840 Natural Populations from Rio de Janeiro, Brazil. *Biomed Res Int.* 2018;2018:2410819.
- 841 32. Linss JG, Brito LP, Garcia GA, Araki AS, Bruno RV, Lima JB, et al. Distribution and  
842 dissemination of the Val1016Ile and Phe1534Cys Kdr mutations in *Aedes aegypti* Brazilian natural  
843 populations. *Parasit Vectors.* 2014;7:25.
- 844 33. Lima EP, Paiva MH, de Araujo AP, da Silva EV, da Silva UM, de Oliveira LN, et al. Insecticide  
845 resistance in *Aedes aegypti* populations from Ceara, Brazil. *Parasit Vectors.* 2011;4:5.

- 846 34. Martins AJ, Lins RM, Linss JG, Peixoto AA, Valle D. Voltage-gated sodium channel  
847 polymorphism and metabolic resistance in pyrethroid-resistant *Aedes aegypti* from Brazil. *Am J Trop*  
848 *Med Hyg.* 2009;81(1):108-15.
- 849 35. Martins AJ, Lima JB, Peixoto AA, Valle D. Frequency of Val1016Ile mutation in the voltage-  
850 gated sodium channel gene of *Aedes aegypti* Brazilian populations. *Trop Med Int Health.*  
851 2009;14(11):1351-5.
- 852 36. Goindin D, Delannay C, Gelasse A, Ramdini C, Gaude T, Faucon F, et al. Levels of insecticide  
853 resistance to deltamethrin, malathion, and temephos, and associated mechanisms in *Aedes aegypti*  
854 mosquitoes from the Guadeloupe and Saint Martin islands (French West Indies). *Infect Dis Poverty.*  
855 2017;6(1):38.
- 856 37. Dusfour I, Zorrilla P, Guidez A, Issaly J, Girod R, Guillaumot L, et al. Deltamethrin Resistance  
857 Mechanisms in *Aedes aegypti* Populations from Three French Overseas Territories Worldwide. *PLoS*  
858 *Negl Trop Dis.* 2015;9(11):e0004226.
- 859 38. Marcombe S, Mathieu RB, Pocquet N, Riaz MA, Poupardin R, Selior S, et al. Insecticide  
860 resistance in the dengue vector *Aedes aegypti* from Martinique: distribution, mechanisms and  
861 relations with environmental factors. *PLoS One.* 2012;7(2):e30989.
- 862 39. Bariami V, Jones CM, Poupardin R, Vontas J, Ranson H. Gene amplification, ABC transporters  
863 and cytochrome P450s: unraveling the molecular basis of pyrethroid resistance in the dengue  
864 vector, *Aedes aegypti*. *PLoS Negl Trop Dis.* 2012;6(6):e1692.
- 865 40. Harris AF, Rajatileka S, Ranson H. Pyrethroid resistance in *Aedes aegypti* from Grand  
866 Cayman. *Am J Trop Med Hyg.* 2010;83(2):277-84.
- 867 41. Alvarez LC, Ponce G, Saavedra-Rodriguez K, Lopez B, Flores AE. Frequency of V1016I and  
868 F1534C mutations in the voltage-gated sodium channel gene in *Aedes aegypti* in Venezuela. *Pest*  
869 *Manag Sci.* 2015;71(6):863-9.
- 870 42. Murcia O, Henriquez B, Castro A, Koo S, Young J, Marquez R, et al. Presence of the point  
871 mutations Val1016Gly in the voltage-gated sodium channel detected in a single mosquito from  
872 Panama. *Parasit Vectors.* 2019;12(1):62.
- 873 43. Estep AS, Sanscrainte ND, Waits CM, Louton JE, Becnel JJ. Resistance Status and Resistance  
874 Mechanisms in a Strain of *Aedes aegypti* (Diptera: Culicidae) From Puerto Rico. *J Med Entomol.*  
875 2017;54(6):1643-8.
- 876 44. Kuri-Morales PA, Correa-Morales F, Gonzalez-Acosta C, Moreno-Garcia M, Santos-Luna R,  
877 Roman-Perez S, et al. Insecticide susceptibility status in Mexican populations of *Stegomyia aegypti*  
878 (= *Aedes aegypti*): a nationwide assessment. *Med Vet Entomol.* 2018;32(2):162-74.
- 879 45. AIRS P. The Zika AIRS Project <http://www.africaairs.net/about-2/2017> [  
880 46. Polson K, Curtis C, Moh Seng C, G Olson J, Chantha N, C Rawlins S. The Use of Ovitrap Baited  
881 with Hay Infusion as a Surveillance Tool for *Aedes aegypti* Mosquitoes in Cambodia 2002.
- 882 47. Rueda L. Pictorial keys for the identification of mosquitoes (Diptera: Culicidae) associated  
883 with Dengue Virus Transmission. *Zootaxa.* 2004;589.
- 884 48. Organization WH. Monitorig and managing insecticide resistance in *Aedes* mosquito  
885 populations. Interim guidance for entomologists. Geneva 2016.
- 886 49. World Health Organization. Test procedures for insecticide resistance monitoring in malaria  
887 vector mosquitoes. Second edition. Geneva: World Health Organization; 2016.
- 888 50. Lovin DD, Washington KO, deBruyn B, Hemme RR, Mori A, Epstein SR, et al. Genome-based  
889 polymorphic microsatellite development and validation in the mosquito *Aedes aegypti* and  
890 application to population genetics in Haiti. *BMC Genomics.* 2009;10:590.
- 891 51. Francis S, Saavedra-Rodriguez K, Perera R, Paine M, Black WCt, Delgoda R. Insecticide  
892 resistance to permethrin and malathion and associated mechanisms in *Aedes aegypti* mosquitoes  
893 from St. Andrew Jamaica. *PLoS One.* 2017;12(6):e0179673.

- 894 52. Lazcano JA, Rodriguez MM, San Martin JL, Romero JE, Montoya R. [Assessing the insecticide  
895 resistance of an *Aedes aegypti* strain in El Salvador]. *Rev Panam Salud Publica*. 2009;26(3):229-34.
- 896 53. Bisset JA, Marin R, Rodriguez MM, Severson DW, Ricardo Y, French L, et al. Insecticide  
897 resistance in two *Aedes aegypti* (Diptera: Culicidae) strains from Costa Rica. *J Med Entomol*.  
898 2013;50(2):352-61.
- 899 54. Garcia GP, Flores AE, Fernandez-Salas I, Saavedra-Rodriguez K, Reyes-Solis G, Lozano-  
900 Fuentes S, et al. Recent rapid rise of a permethrin knock down resistance allele in *Aedes aegypti* in  
901 Mexico. *PLoS Negl Trop Dis*. 2009;3(10):e531.
- 902 55. Auteri M, La Russa F, Blanda V, Torina A. Insecticide Resistance Associated with *kdr*  
903 Mutations in *Aedes albopictus*: An Update on Worldwide Evidences. *Biomed Res Int*.  
904 2018;2018:3098575.
- 905 56. Lumjuan N, Rajatileka S, Changsom D, Wicheer J, Leelapat P, Prapanthadara LA, et al. The  
906 role of the *Aedes aegypti* Epsilon glutathione transferases in conferring resistance to DDT and  
907 pyrethroid insecticides. *Insect Biochem Mol Biol*. 2011;41(3):203-9.
- 908 57. Brengues C, Hawkes NJ, Chandre F, McCarroll L, Duchon S, Guillet P, et al. Pyrethroid and  
909 DDT cross-resistance in *Aedes aegypti* is correlated with novel mutations in the voltage-gated  
910 sodium channel gene. *Med Vet Entomol*. 2003;17(1):87-94.
- 911 58. Davies TGE, Field LM, Usherwood PNR, Williamson MS. DDT, pyrethrins, pyrethroids and  
912 insect sodium channels. 2007;59(3):151-62.
- 913 59. Aizoun N, Osse R, Azondekon R, Alia R, Oussou O, Gnanguenon V, et al. Comparison of the  
914 standard WHO susceptibility tests and the CDC bottle bioassay for the determination of insecticide  
915 susceptibility in malaria vectors and their correlation with biochemical and molecular biology assays  
916 in Benin, West Africa. *Parasites & vectors*. 2013;6:147.
- 917 60. Valle D, Bellinato DF, Viana-Medeiros PF, Lima JBP, Martins Junior AJ. Resistance to  
918 temephos and deltamethrin in *Aedes aegypti* from Brazil between 1985 and 2017. *Mem Inst*  
919 *Oswaldo Cruz*. 2019;114:e180544.
- 920 61. Alvarez LC, Ponce G, Oviedo M, Lopez B, Flores AE. Resistance to malathion and  
921 deltamethrin in *Aedes aegypti* (Diptera: Culicidae) from western Venezuela. *J Med Entomol*.  
922 2013;50(5):1031-9.
- 923 62. Chandre F, Darriet F, Manguin S, Brengues C, Carnevale P, Guillet P. Pyrethroid cross  
924 resistance spectrum among populations of *Anopheles gambiae* s.s. from Cote d'Ivoire. *J Am Mosq*  
925 *Control Assoc*. 1999;15(1):53-9.
- 926 63. Ramasubramanian T, Regupathy A. Pattern of cross-resistance in pyrethroid-selected  
927 populations of *Helicoverpa armigera* Hübner (Lep., Noctuidae) from India. *Journal of Applied*  
928 *Entomology*. 2004;128(9-10):583-7.
- 929 64. Breckenridge CB, Holden L, Sturgess N, Weiner M, Sheets L, Sargent D, et al. Evidence for a  
930 separate mechanism of toxicity for the Type I and the Type II pyrethroid insecticides.  
931 *NeuroToxicology*. 2009;30:S17 - S31.
- 932 65. Minsa: Confirman eficacia del insecticida Malathión para eliminar al zancudo *Aedes aegypti*  
933 en fumigaciones [press release]. Plataforma digital única del Estado Peruano, 5/8/2017 2017.
- 934 66. Santacoloma L, Chaves B, Brochero HL. [Susceptibility of natural populations of dengue  
935 vector to insecticides in Colombia]. *Biomedica*. 2012;32(3):333-43.
- 936 67. van den Berg H, Zaim M, Yadav RS, Soares A, Ameneshewa B, Mnzava A, et al. Global trends  
937 in the use of insecticides to control vector-borne diseases. 2012;120(4):577-82.
- 938 68. Rodriguez MM, Bisset J, Ruiz M, Soca A. Cross-resistance to pyrethroid and  
939 organophosphorus insecticides induced by selection with temephos in *Aedes aegypti* (Diptera:  
940 Culicidae) from Cuba. *J Med Entomol*. 2002;39(6):882-8.



- 941 69. Tikar SN, Kumar A, Prasad GB, Prakash S. Temephos-induced resistance in *Aedes aegypti*  
942 and its cross-resistance studies to certain insecticides from India. *Parasitol Res.* 2009;105(1):57-63.
- 943 70. Wirth MC, Georghiou GJJotAMCA. Selection and characterization of temephos resistance in  
944 a population of *Aedes aegypti* from Tortola, British Virgin Islands. 1999;15(3):315-20.
- 945 71. Rodriguez MM, Bisset JA, Fernandez D. Levels of insecticide resistance and resistance  
946 mechanisms in *Aedes aegypti* from some Latin American countries. *J Am Mosq Control Assoc.*  
947 2007;23(4):420-9.
- 948 72. Rodriguez MM, Bisset J, de Fernandez DM, Lauzan L, Soca A. Detection of insecticide  
949 resistance in *Aedes aegypti* (Diptera: Culicidae) from Cuba and Venezuela. *J Med Entomol.*  
950 2001;38(5):623-8.
- 951 73. Bharati M, Saha D. Multiple insecticide resistance mechanisms in primary dengue vector,  
952 *Aedes aegypti* (Linn.) from dengue endemic districts of sub-Himalayan West Bengal, India. *PLoS One.*  
953 2018;13(9):e0203207.
- 954 74. Brogdon WG, Beach RF, Barber AM, Cordon-Rosales C. A generalized approach to detection  
955 of organophosphate resistance in mosquitoes. *Medical and veterinary entomology.* 1992;6(2):110-  
956 4.
- 957 75. Haziqah-Rashid A, Chen CD, Lau KW, Low VL, Sofian-Azirun M, Suana IW, et al. Monitoring  
958 Insecticide Resistance Profiles of *Aedes aegypti* (Diptera: Culicidae) in the Sunda Islands of Indonesia  
959 Based on Diagnostic Doses of Larvicides. *J Med Entomol.* 2019;56(2):514-8.
- 960 76. Bisset JA, Rodriguez MM, Caceres L. [Levels of resistance to insecticides and their  
961 mechanisms in 2 strains of *Aedes aegypti* from Panama]. *Rev Cubana Med Trop.* 2003;55(3):191-5.
- 962 77. Coto MM, Lazcano JA, Soca A. Malathion resistance in *Aedes aegypti* and *Culex*  
963 *quinquefasciatus* after its use in *Aedes aegypti* control programs. *J Am Mosq Control Assoc.*  
964 2000;16(4):324-30.
- 965 78. Francis S, Saavedra-Rodriguez K, Perera R, Paine M, Black WCt, Delgoda R. Correction:  
966 Insecticide resistance to permethrin and malathion and associated mechanisms in *Aedes aegypti*  
967 mosquitoes from St. Andrew Jamaica. *PLoS One.* 2017;12(8):e0184387.
- 968 79. Kenney JL, Burkhalter KL, Scott ML, McAllister J, Lang FE, Webster S, et al. Entomological  
969 Investigations During Early Stages of A Chikungunya Outbreak In the United States Virgin Islands,  
970 2014. *J Am Mosq Control Assoc.* 2017;33(1):8-15.
- 971 80. Lima JB, Da-Cunha MP, Da Silva RC, Galardo AK, Soares Sda S, Braga IA, et al. Resistance of  
972 *Aedes aegypti* to organophosphates in several municipalities in the State of Rio de Janeiro and  
973 Espirito Santo, Brazil. *Am J Trop Med Hyg.* 2003;68(3):329-33.
- 974 81. Mekuria Y, Gwinn TA, Williams DC, Tidwell MA. Insecticide susceptibility of *Aedes aegypti*  
975 from Santo Domingo, Dominican Republic. *J Am Mosq Control Assoc.* 1991;7(1):69-72.
- 976 82. Organization WH. Global strategy for dengue prevention and control 2012-2020. 2012.
- 977 83. Haddi K, Tome HVV, Du Y, Valbon WR, Nomura Y, Martins GF, et al. Detection of a new  
978 pyrethroid resistance mutation (V410L) in the sodium channel of *Aedes aegypti*: a potential  
979 challenge for mosquito control. *Sci Rep.* 2017;7:46549.
- 980 84. Yanola J, Somboon P, Walton C, Nachaiwieng W, Somwang P, Prapanthadara LA. High-  
981 throughput assays for detection of the F1534C mutation in the voltage-gated sodium channel gene  
982 in permethrin-resistant *Aedes aegypti* and the distribution of this mutation throughout Thailand.  
983 *Trop Med Int Health.* 2011;16(4):501-9.
- 984 85. Srisawat R, Komalamisra N, Eshita Y, Zheng M, Ono K, Itoh T, et al. Point mutations in domain  
985 II of the voltage-gated sodium channel gene in deltamethrin-resistant *Aedes aegypti* (Diptera:  
986 Culicidae). *Appl Entomol Zool.* 2010;45(2):275-82.

- 987 86. Chang C, Shen WK, Wang TT, Lin YH, Hsu EL, Dai SM. A novel amino acid substitution in a  
988 voltage-gated sodium channel is associated with knockdown resistance to permethrin in *Aedes*  
989 *aegypti*. *Insect Biochem Mol Biol*. 2009;39(4):272-8.
- 990 87. McAllister JC, Godsey MS, Scott ML. Pyrethroid resistance in *Aedes aegypti* and *Aedes*  
991 *albopictus* from Port-au-Prince, Haiti. *Journal of Vector Ecology*. 2012;37(2):325-32.
- 992 88. Sombie A, Saiki E, Yameogo F, Sakurai T, Shirozu T, Fukumoto S, et al. High frequencies of  
993 F1534C and V1016I *kdr* mutations and association with pyrethroid resistance in *Aedes aegypti* from  
994 Somgande (Ouagadougou), Burkina Faso. *Trop Med Health*. 2019;47:2.
- 995 89. Saha P, Chatterjee M, Ballav S, Chowdhury A, Basu N, Maji AK. Prevalence of *kdr* mutations  
996 and insecticide susceptibility among natural population of *Aedes aegypti* in West Bengal. *PLoS One*.  
997 2019;14(4):e0215541.
- 998 90. Leong CS, Vythilingam I, Liew JW, Wong ML, Wan-Yusoff WS, Lau YL. Enzymatic and  
999 molecular characterization of insecticide resistance mechanisms in field populations of *Aedes*  
1000 *aegypti* from Selangor, Malaysia. *Parasit Vectors*. 2019;12(1):236.
- 1001 91. Grossman MK, Rodriguez J, Barreiro AM, Lenhart A, Manrique-Saide P, Vazquez-Prokopec  
1002 GM. Fine-scale spatial and temporal dynamics of *kdr* haplotypes in *Aedes aegypti* from Mexico.  
1003 *Parasit Vectors*. 2019;12(1):20.
- 1004 92. Chung HH, Cheng IC, Chen YC, Lin C, Tomita T, Teng HJ. Voltage-gated sodium channel intron  
1005 polymorphism and four mutations comprise six haplotypes in an *Aedes aegypti* population in  
1006 Taiwan. *PLoS Negl Trop Dis*. 2019;13(3):e0007291.
- 1007 93. Chen M, Du Y, Wu S, Nomura Y, Zhu G, Zhorov BS, et al. Molecular evidence of sequential  
1008 evolution of DDT- and pyrethroid-resistant sodium channel in *Aedes aegypti*. *PLoS Negl Trop Dis*.  
1009 2019;13(6):e0007432.
- 1010 94. Badolo A, Sombie A, Pignatelli PM, Sanon A, Yameogo F, Wangrawa DW, et al. Insecticide  
1011 resistance levels and mechanisms in *Aedes aegypti* populations in and around Ouagadougou,  
1012 Burkina Faso. *PLoS Negl Trop Dis*. 2019;13(5):e0007439.
- 1013 95. Aponte A, Penilla RP, Rodriguez AD, Ocampo CB. Mechanisms of pyrethroid resistance in  
1014 *Aedes (Stegomyia) aegypti* from Colombia. *Acta Trop*. 2019;191:146-54.
- 1015 96. Soni M, Bhattacharya C, Sharma J, Dutta P. Bioassay and molecular study for detection of  
1016 insecticide resistance dengue causing mosquito vectors. *Indian J Med Microbiol*. 2018;36(3):435-8.
- 1017 97. Alvarez-Gonzalez LC, Briceno A, Ponce-Garcia G, Villanueva-Segura OK, Davila-Barboza JA,  
1018 Lopez-Monroy B, et al. Assessing the effect of selection with deltamethrin on biological parameters  
1019 and detoxifying enzymes in *Aedes aegypti* (L.). *Pest Manag Sci*. 2017;73(11):2287-93.
- 1020 98. Al Nazawi AM, Aqili J, Alzahrani M, McCall PJ, Weetman D. Combined target site (*kdr*)  
1021 mutations play a primary role in highly pyrethroid resistant phenotypes of *Aedes aegypti* from Saudi  
1022 Arabia. *Parasit Vectors*. 2017;10(1):161.
- 1023 99. Plernsub S, Saingamsook J, Yanola J, Lumjuan N, Tippawangkosol P, Sukontason K, et al.  
1024 Additive effect of knockdown resistance mutations, S989P, V1016G and F1534C, in a heterozygous  
1025 genotype conferring pyrethroid resistance in *Aedes aegypti* in Thailand. *Parasit Vectors*.  
1026 2016;9(1):417.
- 1027 100. Kawada H, Higa Y, Futami K, Muranami Y, Kawashima E, Osei JH, et al. Discovery of Point  
1028 Mutations in the Voltage-Gated Sodium Channel from African *Aedes aegypti* Populations: Potential  
1029 Phylogenetic Reasons for Gene Introgression. *PLoS Negl Trop Dis*. 2016;10(6):e0004780.
- 1030 101. Kushwah RB, Dykes CL, Kapoor N, Adak T, Singh OP. Pyrethroid-resistance and presence of  
1031 two knockdown resistance (*kdr*) mutations, F1534C and a novel mutation T1520I, in Indian *Aedes*  
1032 *aegypti*. *PLoS Negl Trop Dis*. 2015;9(1):e3332.



- 1033 102. Granada Y, Mejia-Jaramillo AM, Strode C, Triana-Chavez O. A Point Mutation V419L in the  
1034 Sodium Channel Gene from Natural Populations of *Aedes aegypti* Is Involved in Resistance to  
1035 lambda-Cyhalothrin in Colombia. *Insects*. 2018;9(1).
- 1036 103. Seixas G, Grigoraki L, Weetman D, Vicente JL, Silva AC, Pinto J, et al. Insecticide resistance is  
1037 mediated by multiple mechanisms in recently introduced *Aedes aegypti* from Madeira Island  
1038 (Portugal). *PLoS Negl Trop Dis*. 2017;11(7):e0005799.
- 1039 104. Fernando SD, Hapugoda M, Perera R, Saavedra-Rodriguez K, Black WCt, De Silva NK. First  
1040 report of V1016G and S989P knockdown resistant (kdr) mutations in pyrethroid-resistant Sri Lankan  
1041 *Aedes aegypti* mosquitoes. *Parasit Vectors*. 2018;11(1):526.
- 1042 105. Zamora Perea E, Balta León R, Palomino Salcedo M, Brogdon WG, Devine GJJMJ. Adaptation  
1043 and evaluation of the bottle assay for monitoring insecticide resistance in disease vector mosquitoes  
1044 in the Peruvian Amazon. 2009;8(1):208.
- 1045 106. Diseases WHOCoC. Test procedures for insecticide resistance monitoring in malaria vectors,  
1046 bio-efficacy and persistence of insecticides on treated surfaces : report of the WHO informal  
1047 consultation. Geneva: World Health Organization; 1998.
- 1048 107. Aizoun N, Azondekon R, Aikpon R, Gnanguenon V, Osse R, Asidi A, et al. Study of the efficacy  
1049 of a Wheaton coated bottle with permethrin and deltamethrin in laboratory conditions and a WHO  
1050 impregnated paper with bendiocarb in field conditions. *Asian Pacific Journal of Tropical  
1051 Biomedicine*. 2014;4(6):492-7.
- 1052 108. Kuno G. Early History of Laboratory Breeding of *Aedes aegypti* (Diptera: Culicidae) Focusing  
1053 on the Origins and Use of Selected Strains. *Journal of Medical Entomology*. 2014;47(6):957-71.
- 1054 109. Benedict MQ, Knols BG, Bossin HC, Howell PI, Mialhe E, Caceres C, et al. Colonisation and  
1055 mass rearing: learning from others. 2009;8(2):S4.

1056

## 1057 **Supporting Information captions**

1058 **S1 Table. List of all locations, countries, dates, insecticides, methodologies**  
1059 **and mortality values obtained.**

1060 **S2 Table. Summary of type of insecticide and concentrations employed for**  
1061 **bioassays.**

1062 **S3 Text file. Laboratory protocols for the kdr mutation molecular screening.**

1063 **S4 Table. Raw data containing the genotypes for each specimen processed**  
1064 **during the molecular studies.**

1065 **S5 Table. Summary of the mutations vs. codons found during the molecular**  
1066 **studies.**

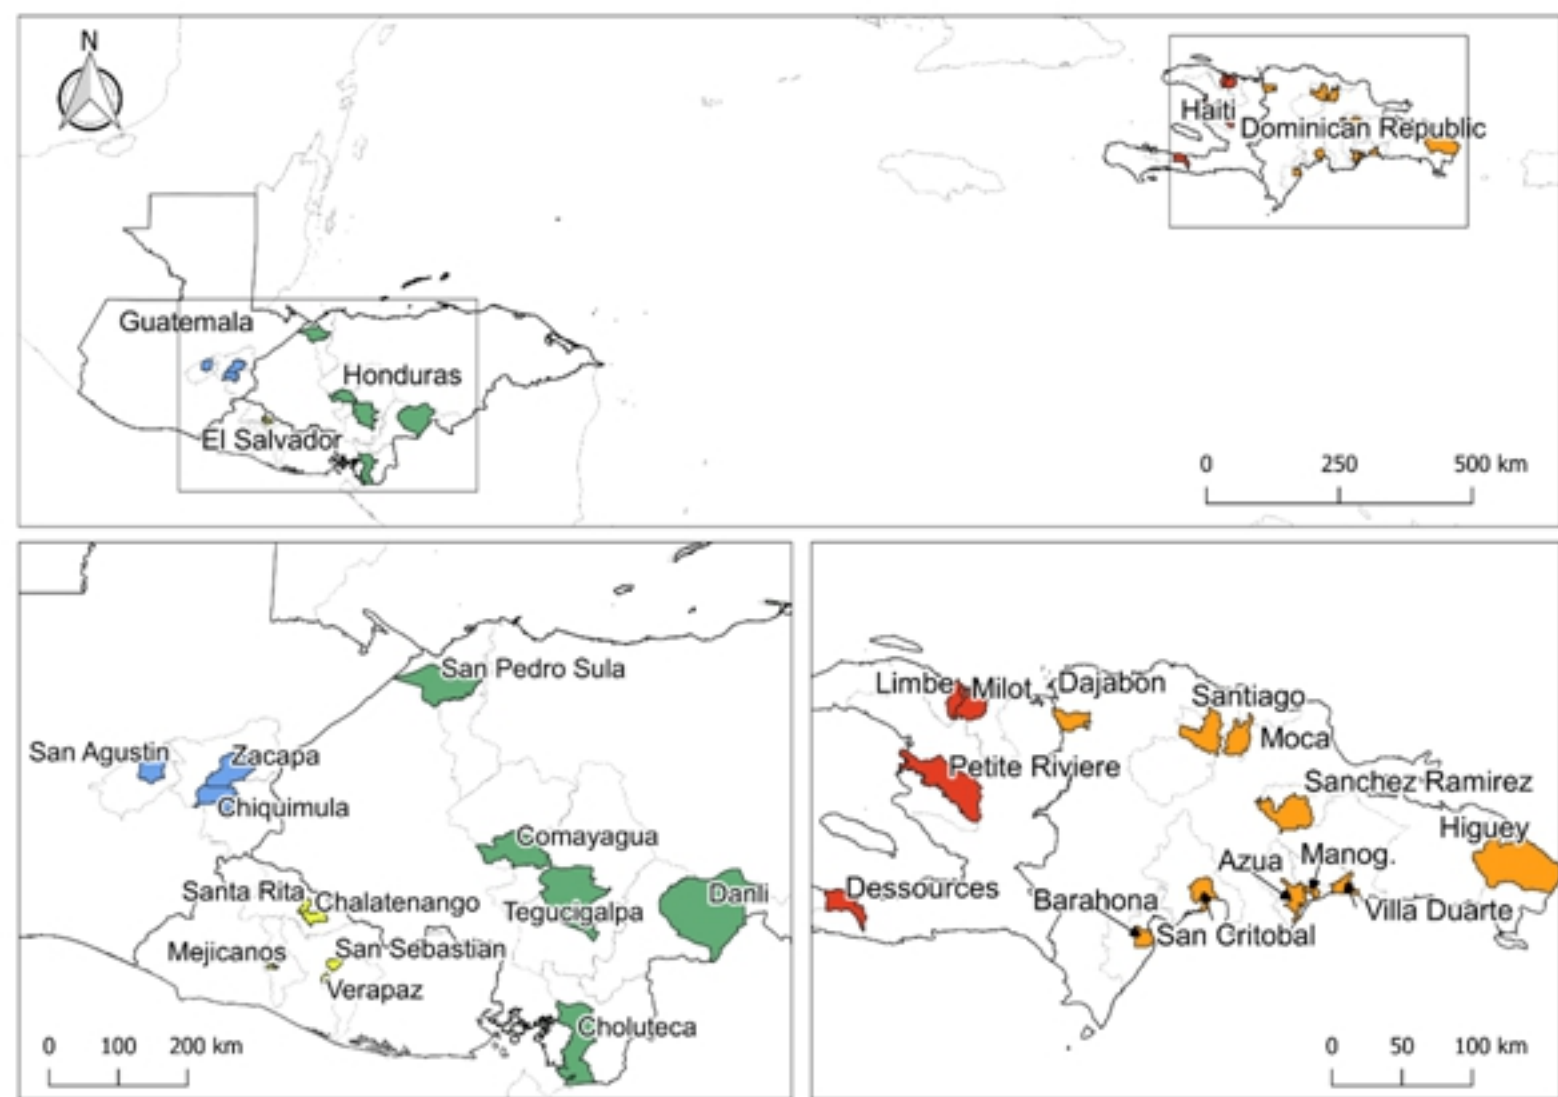

Figure 1

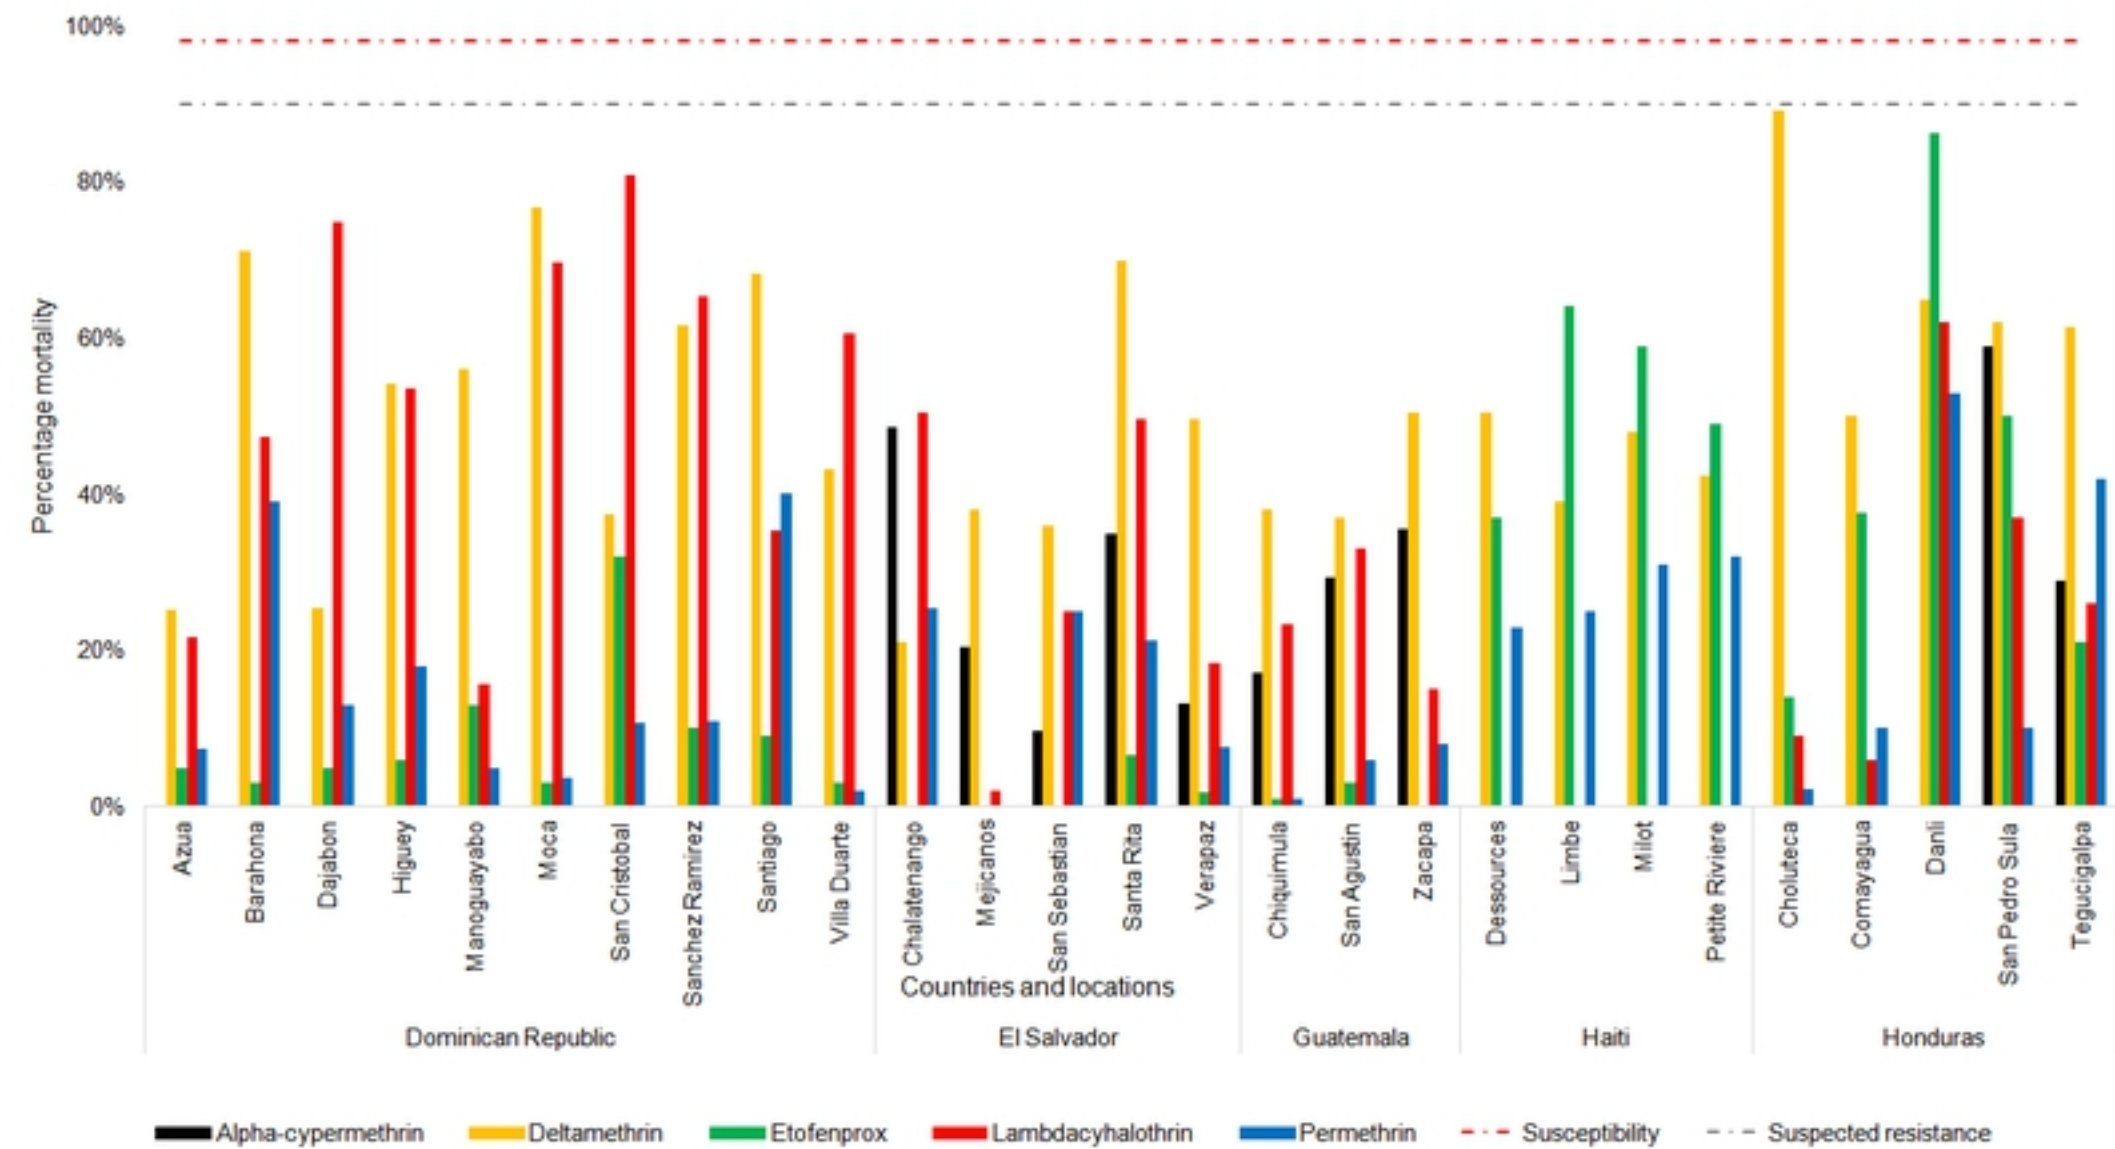

Figure 2

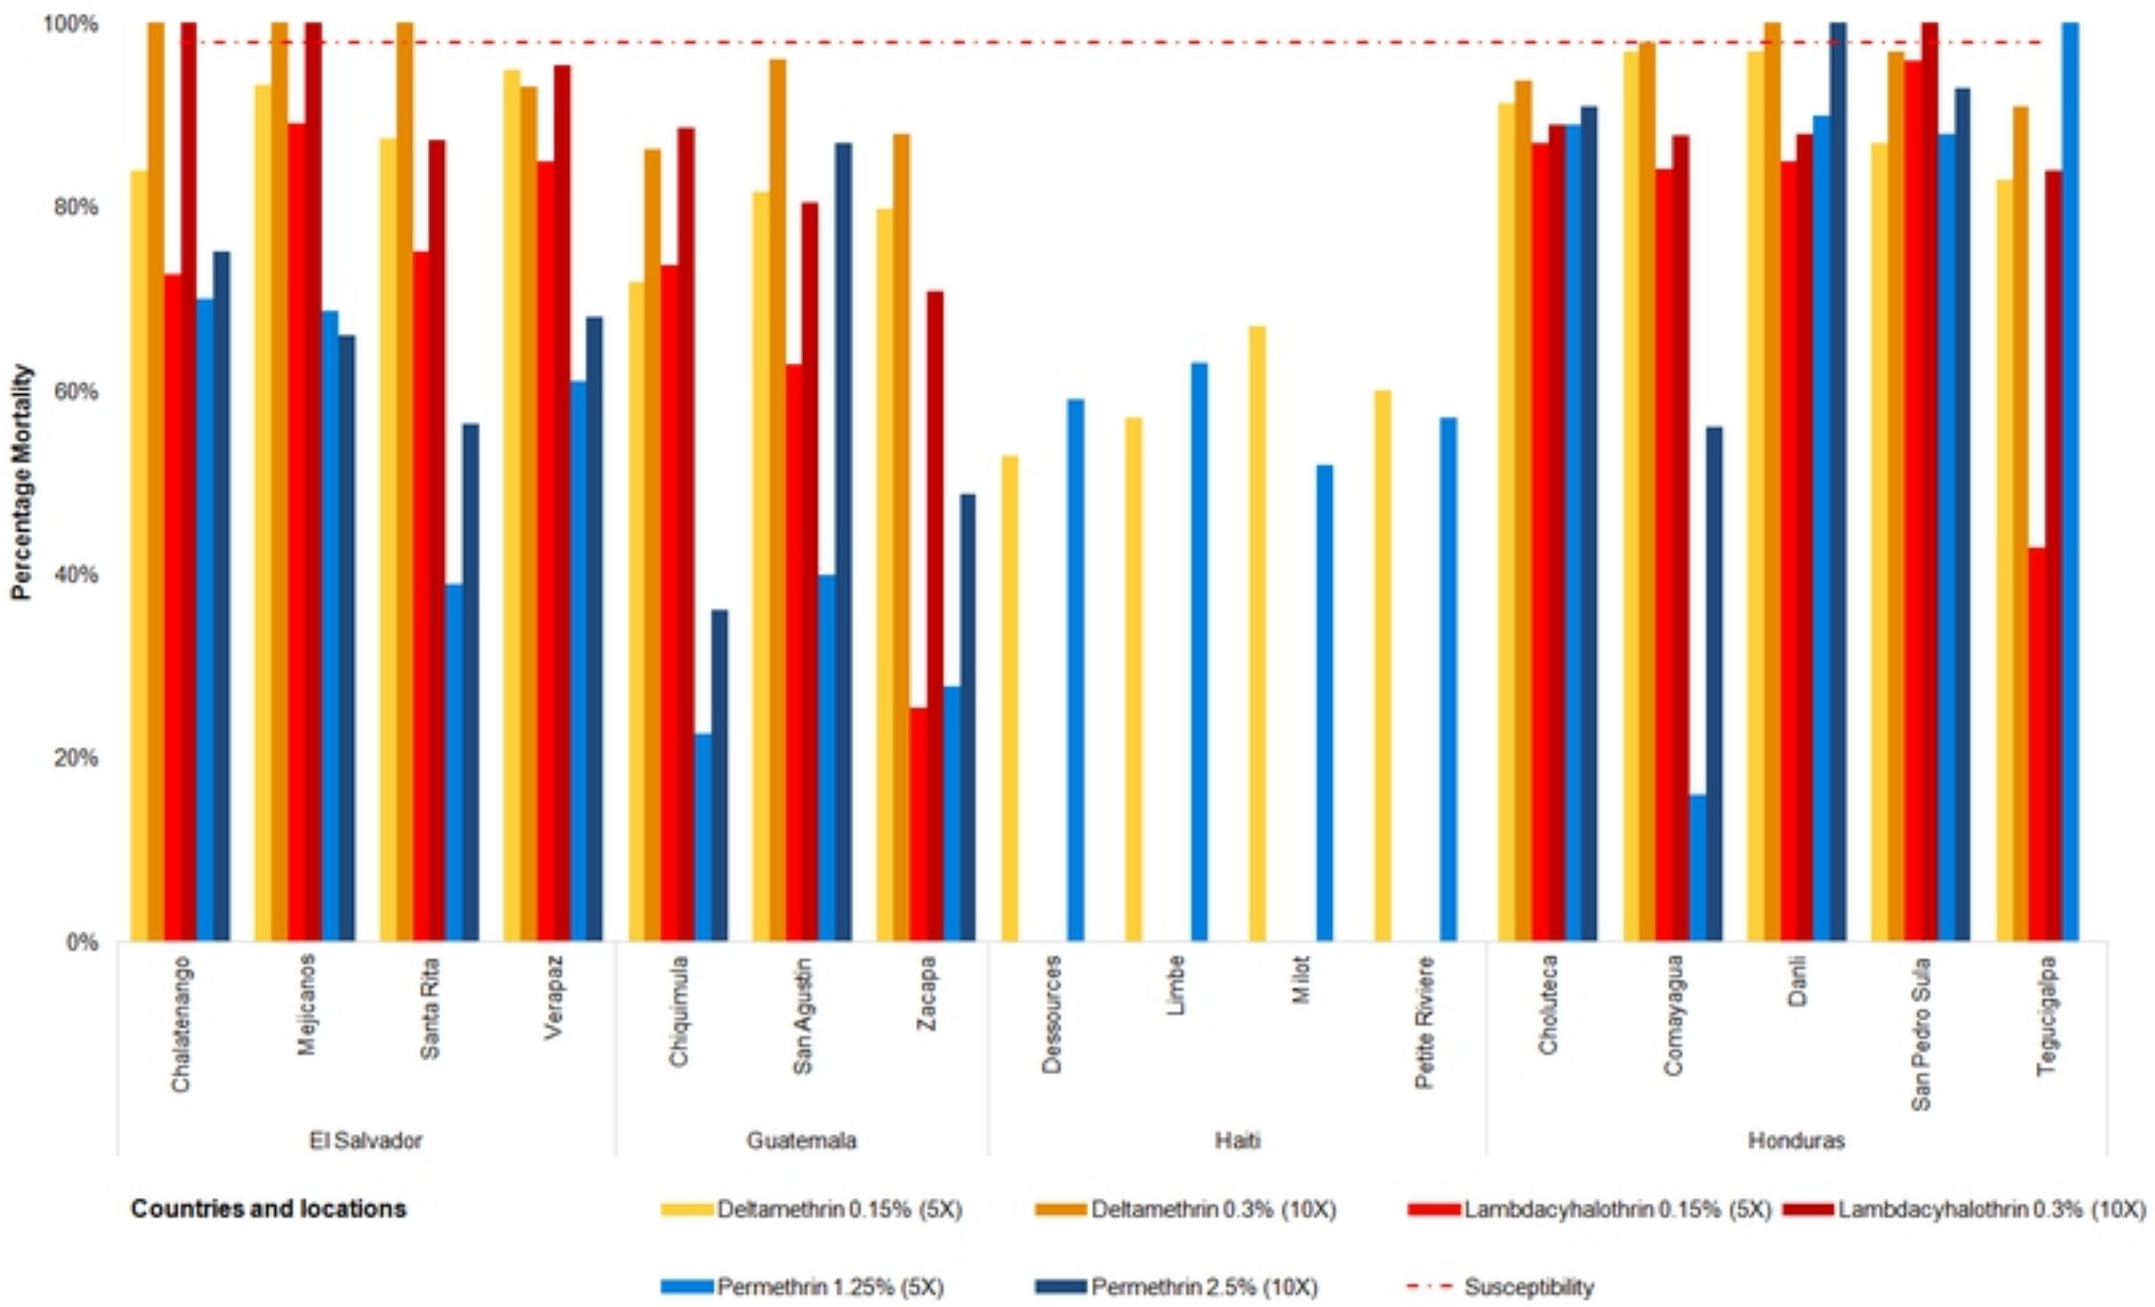

Figure 3

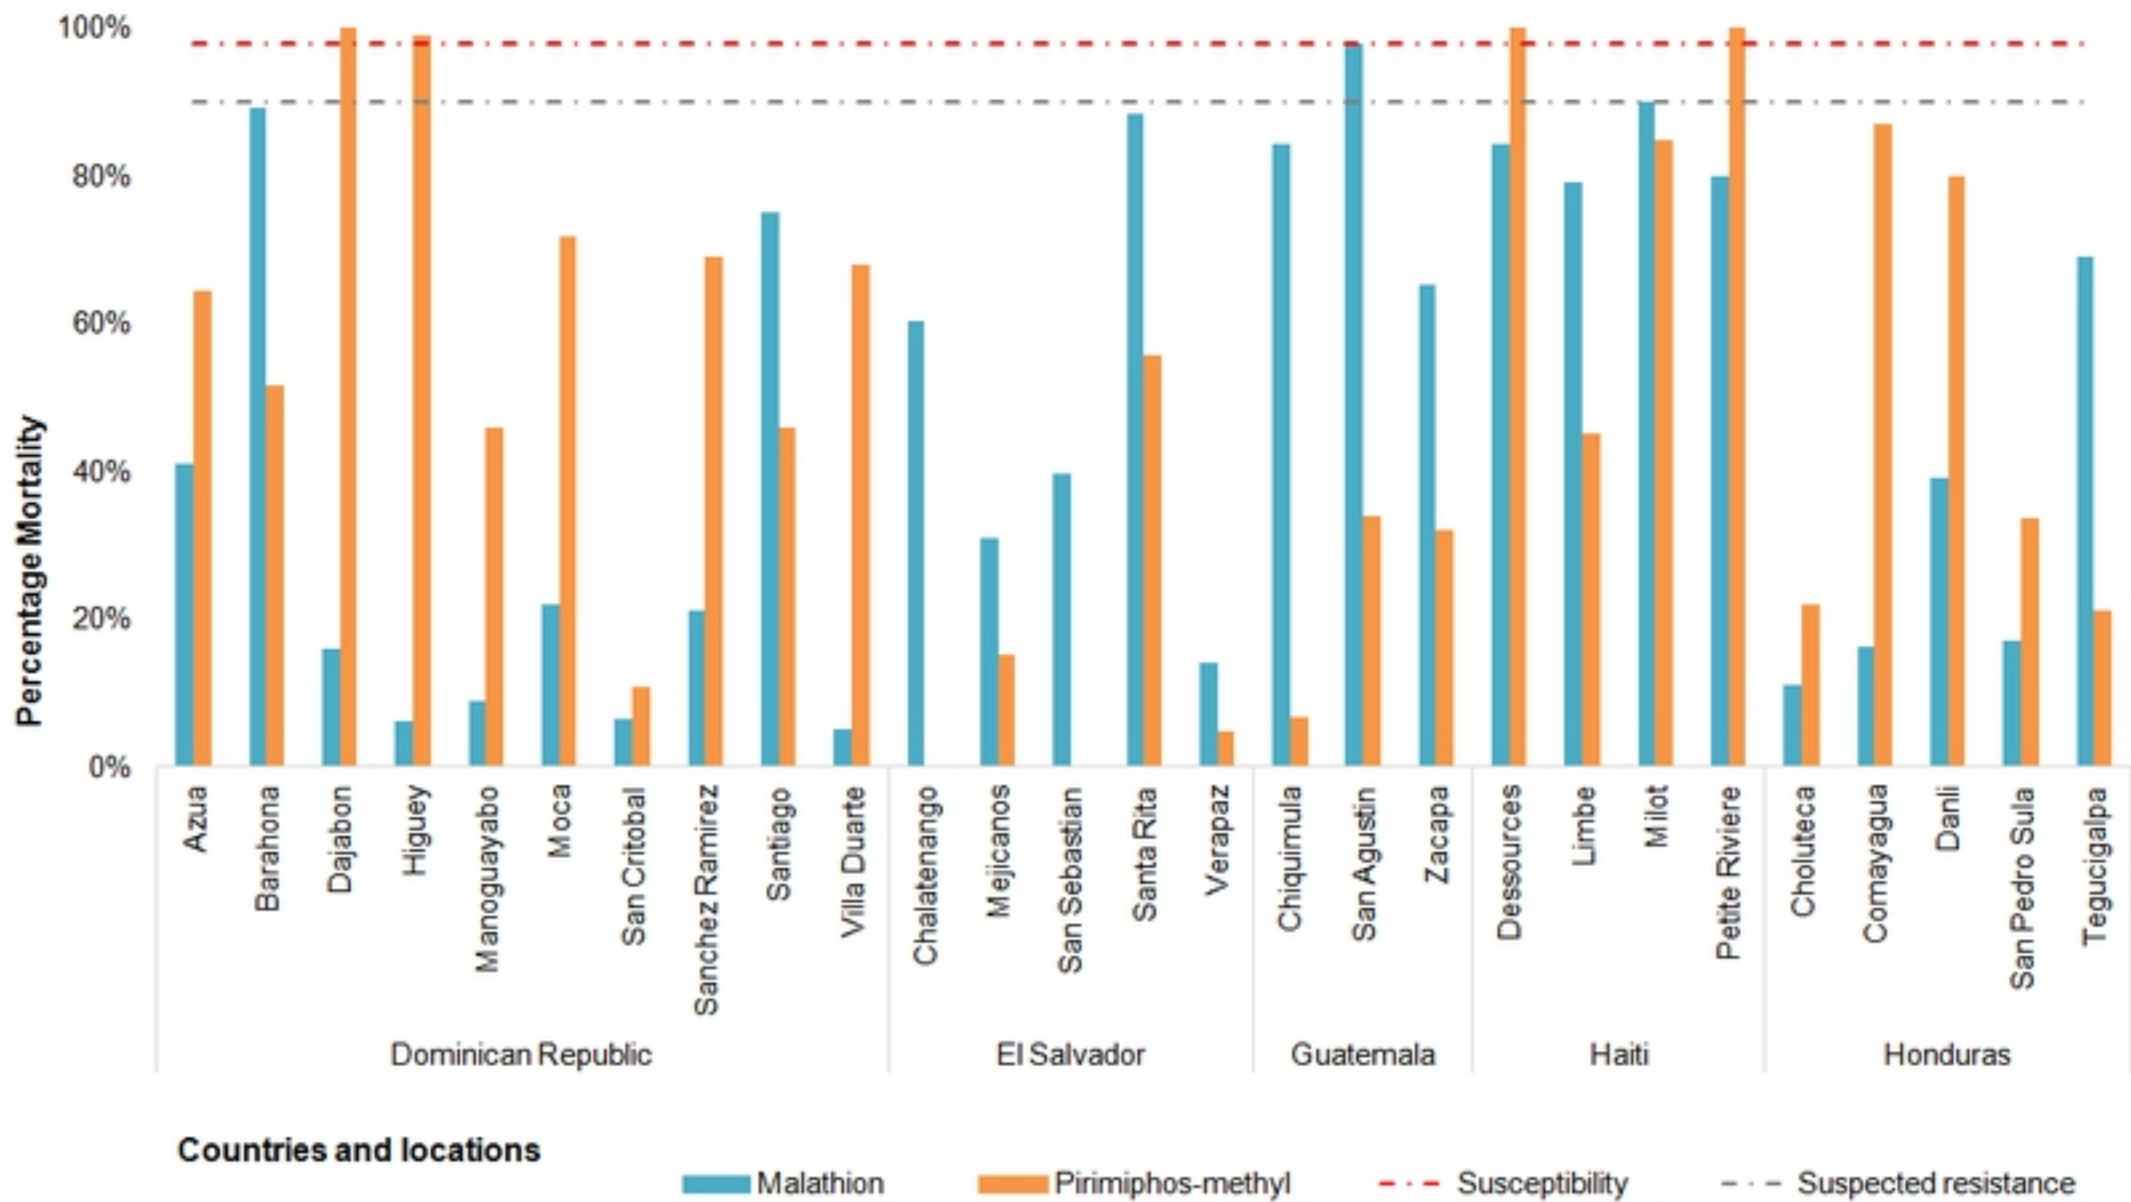

Figure 4

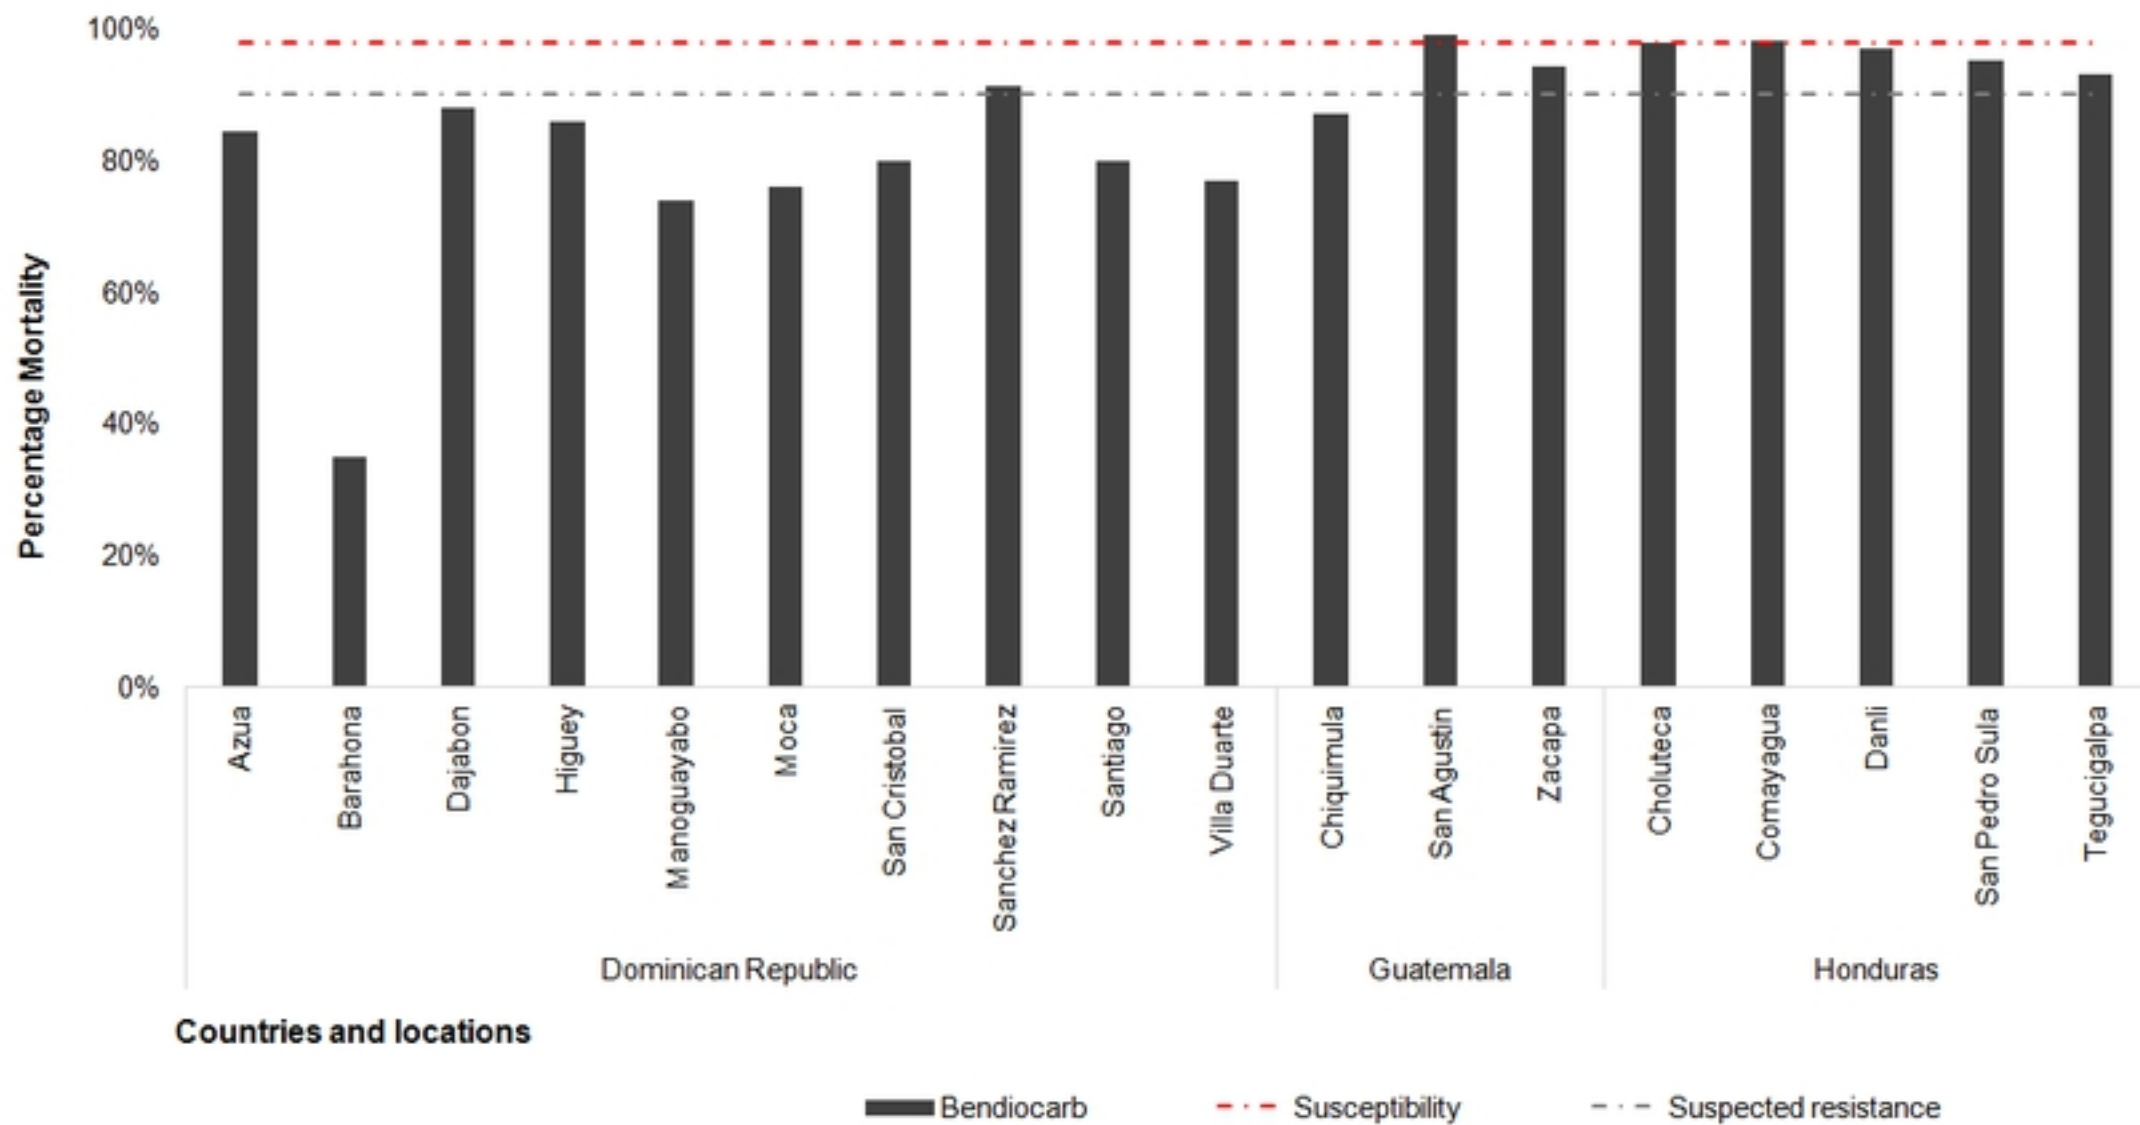

Figure 5

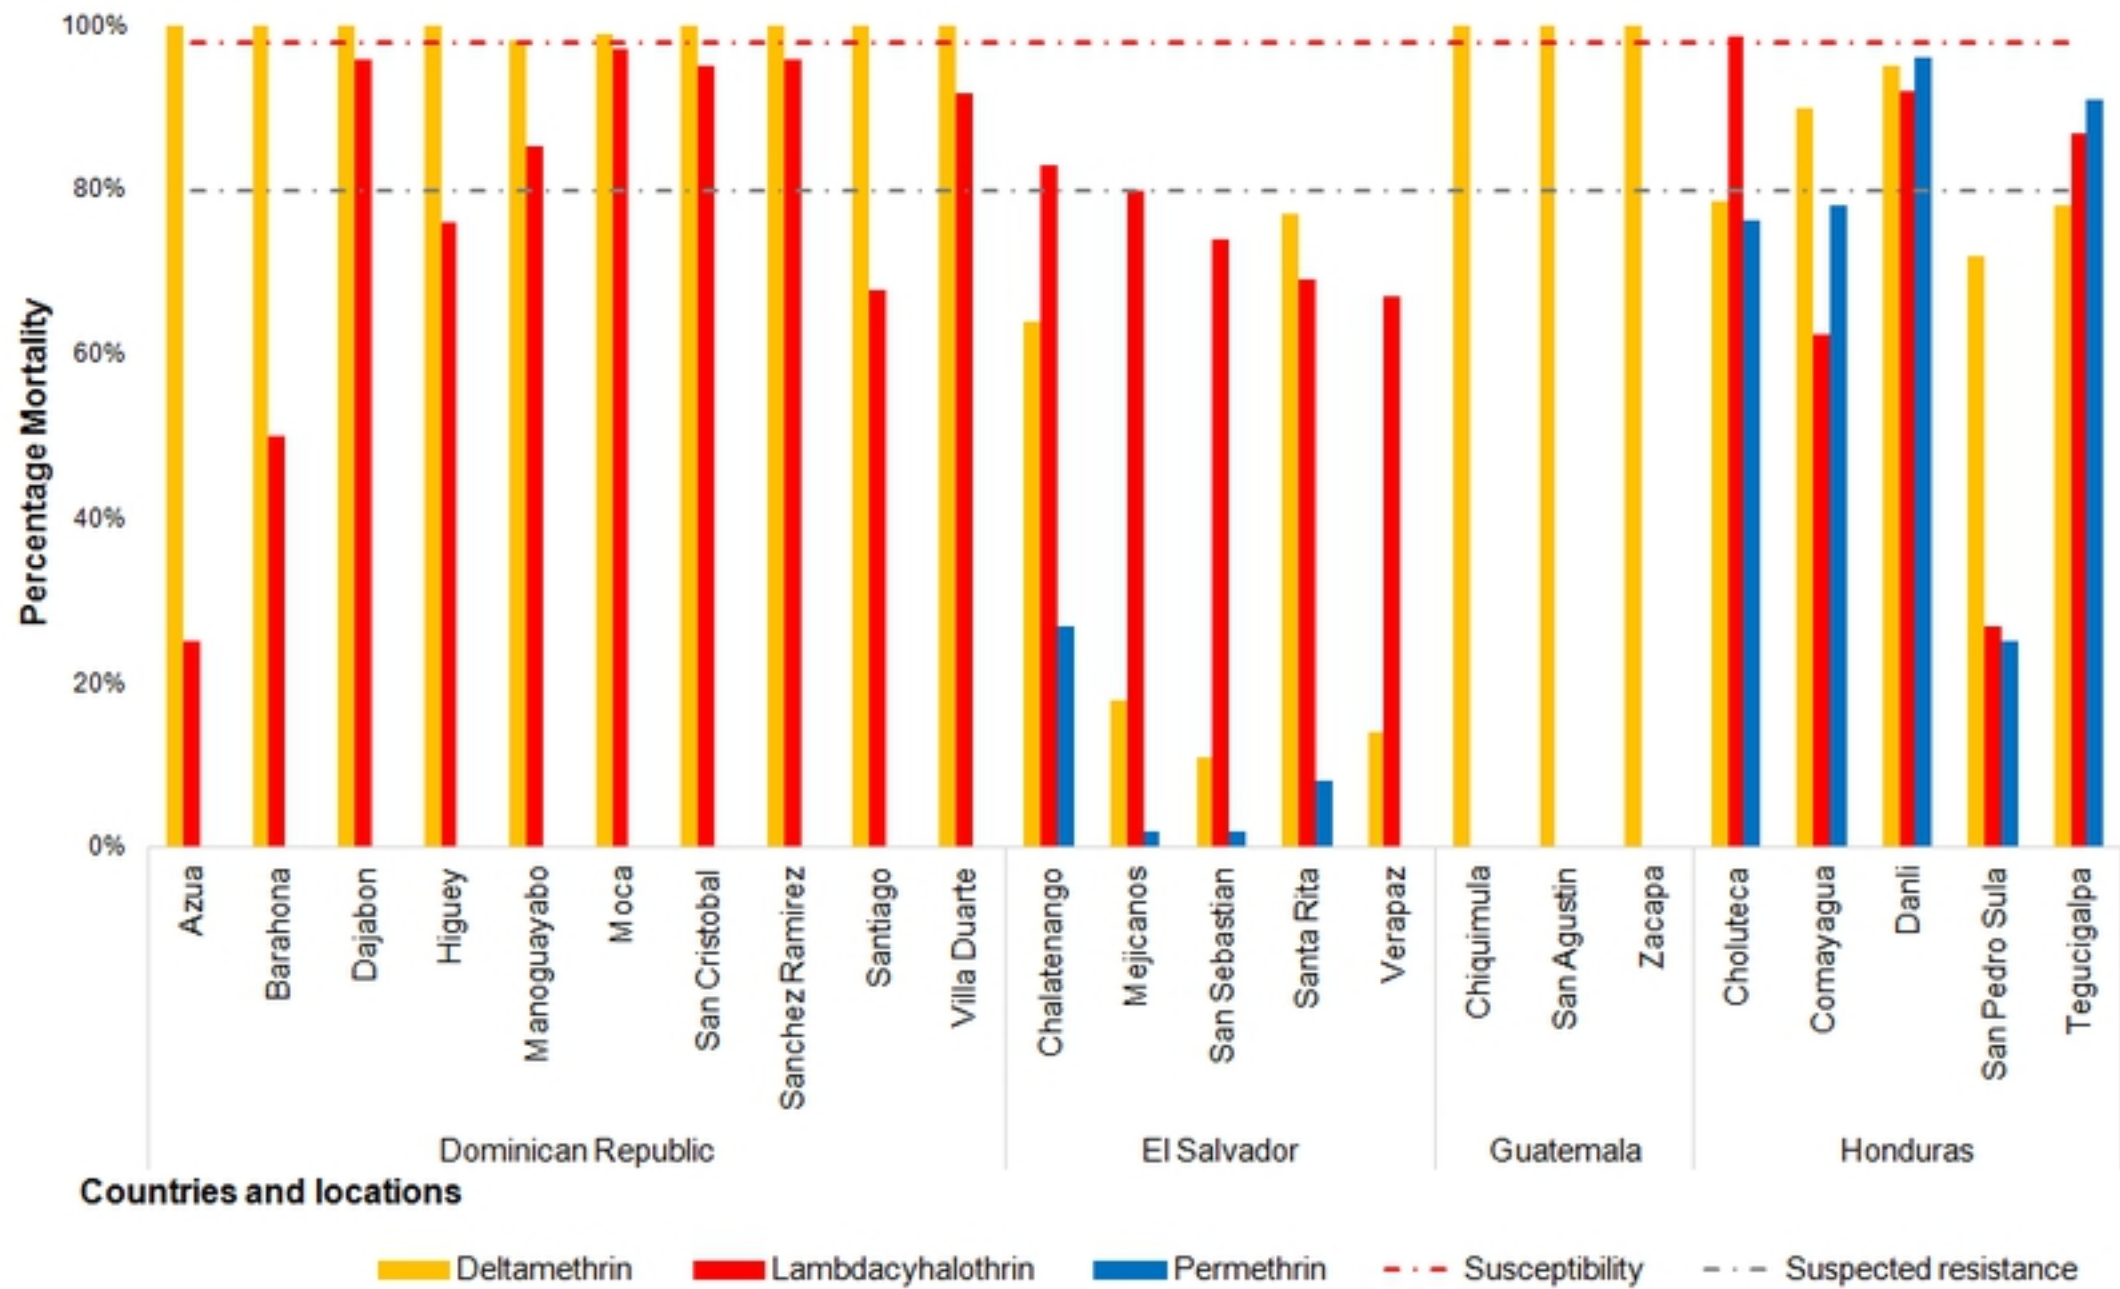

Figure 6



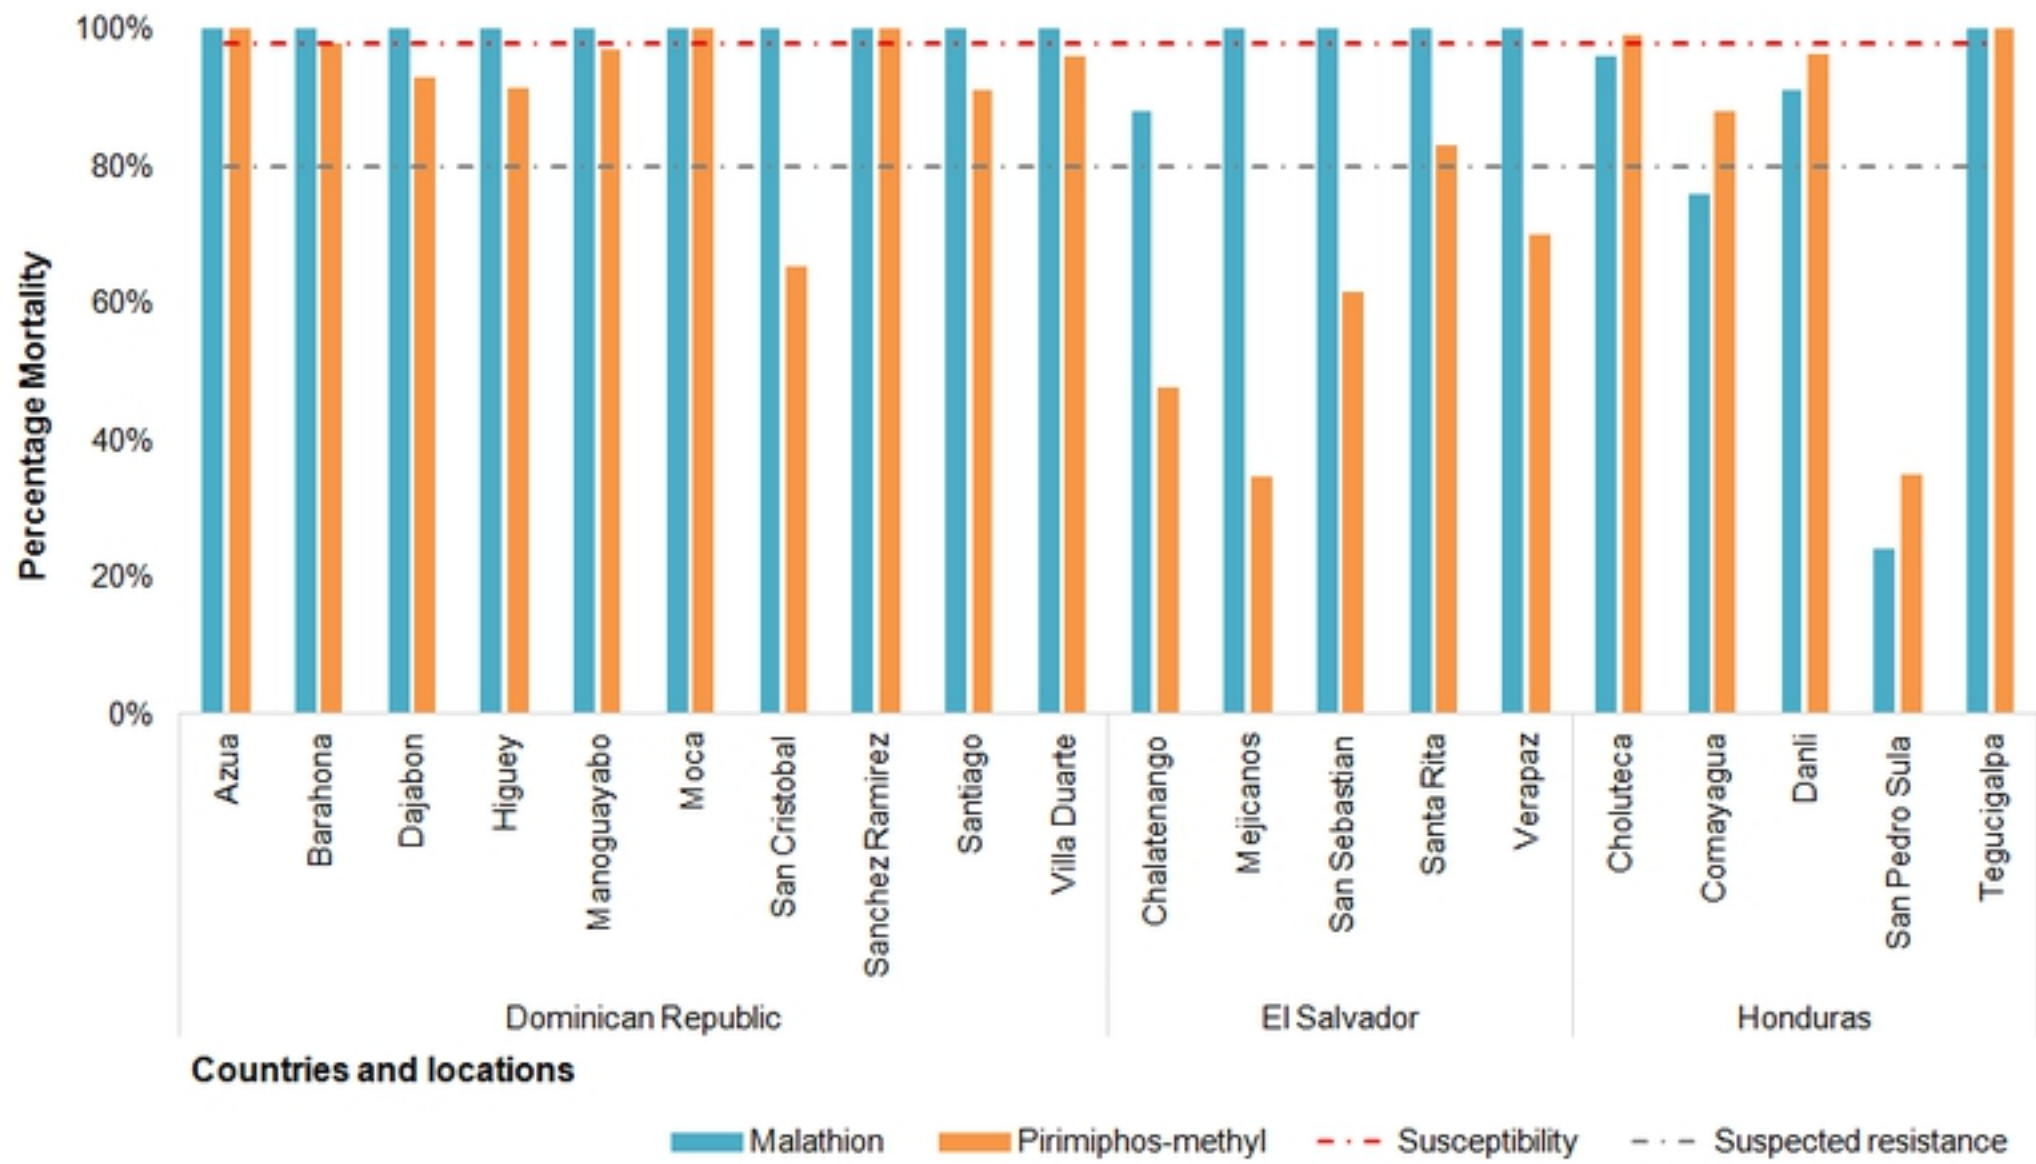

Figure 7



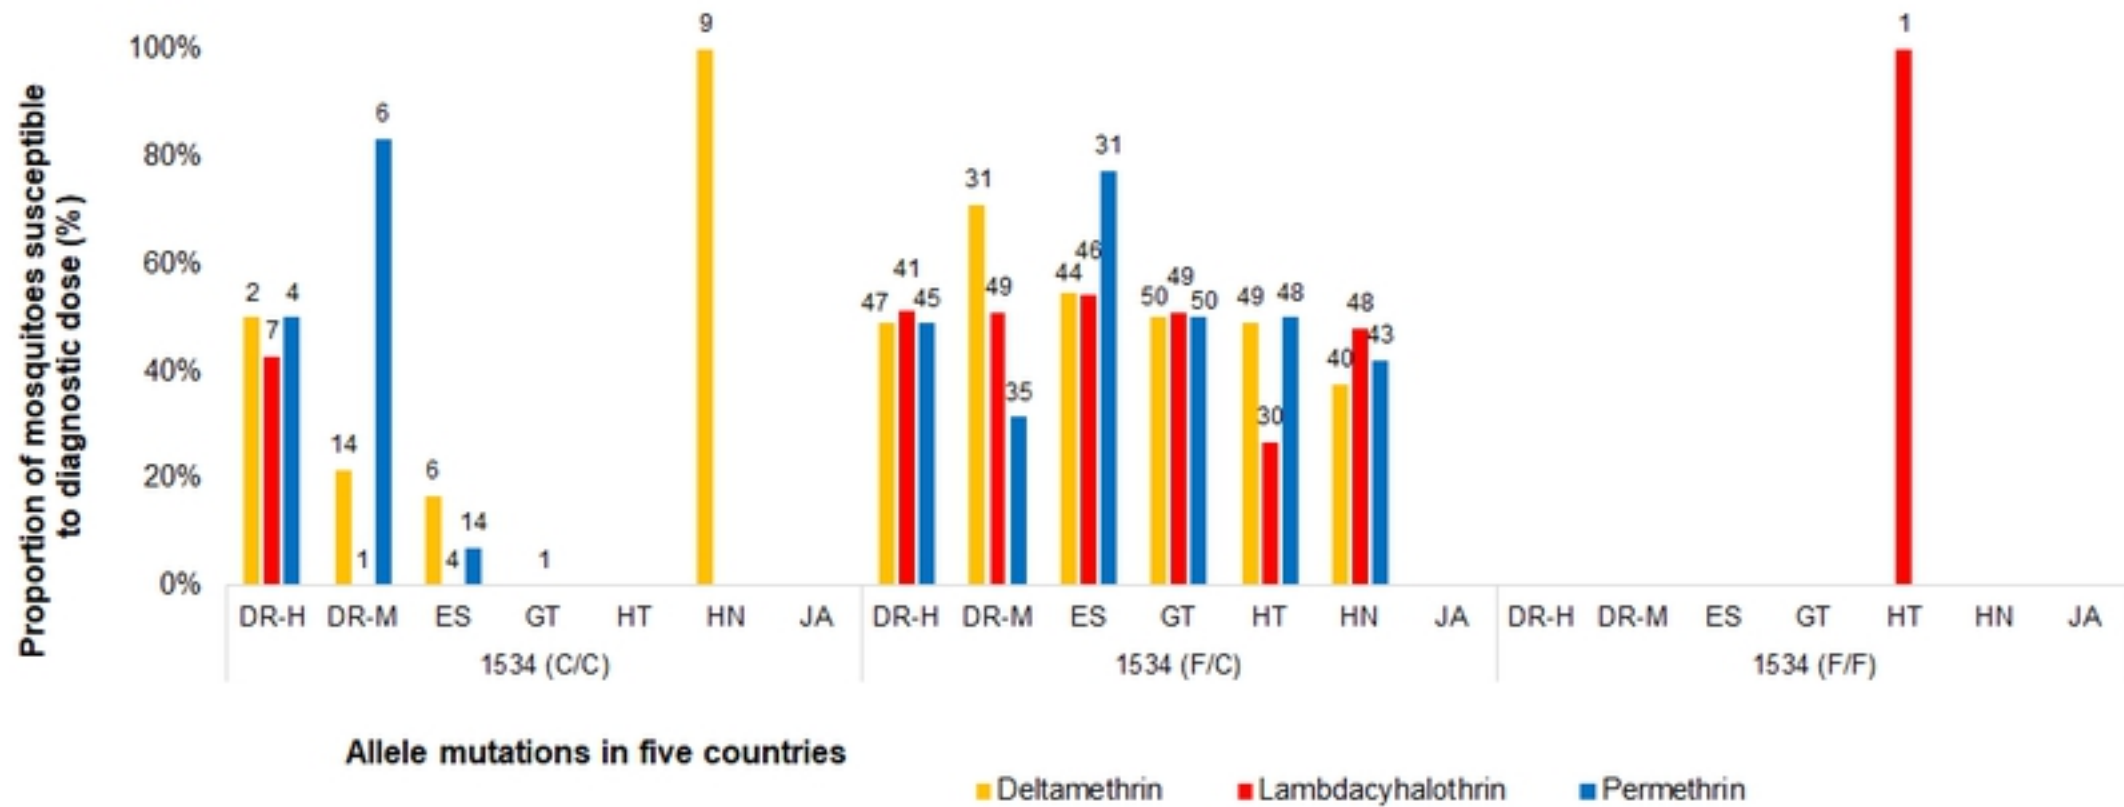

DR-H: Dominican Republic - Higüey, DR-M: Dominican Republic - Manoguayabo, ES: El Salvador, GT: Guatemala, HT: Haiti, HN: Honduras

Figure 8

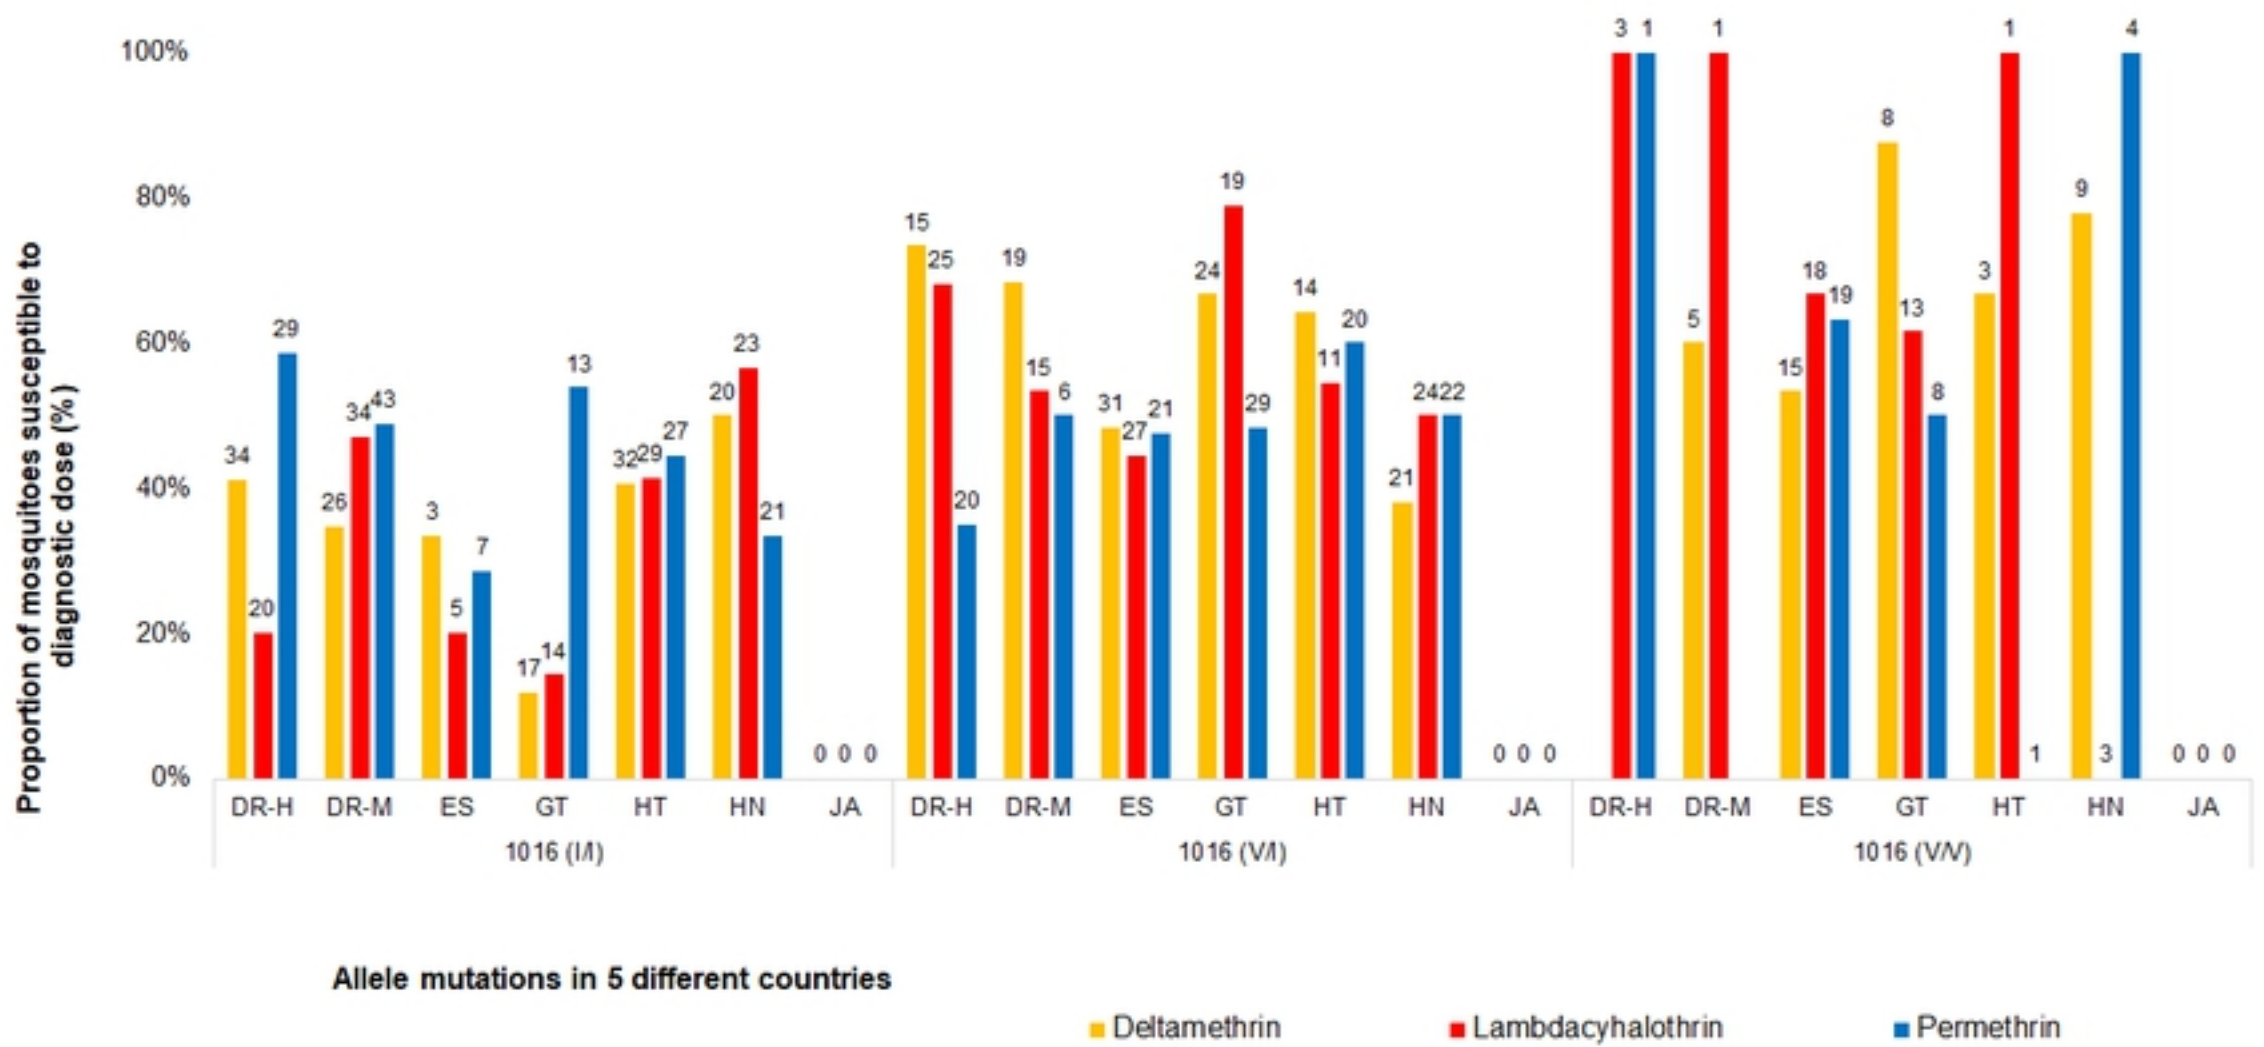

DR-H: Dominican Republic - Higüey, DR-M: Dominican Republic - Manoguayabo, ES: El Salvador, GT: Guatemala, HT: Haiti, HN: Honduras

Figure 9
